# Supplementary material for: Roles for circulating polyunsaturated fatty acids in ischemic stroke and modifiable factors: a Mendelian randomization study
Source: Nutr J. 2020 Jul 11;19:70. doi: 10.1186/s12937-020-00582-4 (PMC7354684; doi:10.1186/s12937-020-00582-4)
Supplement: Supplementary file 1 — Additional file 1: Table S1. Significant and bi-allelic SNPs (p < 5 × 10− 8) in GWAS of linoleic acid. Table S2. Significant and bi-allelic SNPs (p < 5 × 10− 8) in GWAS of arachidonic acid. Table S3. Significant and bi-allelic SNPs (p < 5 × 10− 8) in GWAS of a-linolenic acid. Table S4. Significant and bi-allelic SNPs (p < 5 × 10− 8) in GWAS of eicosapentaenoic acid. Table S5. Significant and bi-allelic SNPs (p < 5 × 10− 8) in GWAS of docosahexaenoic acid. Table S6. Significant and bi-allelic SNPs (p < 5 × 10− 8) in GWAS of docosapentaenoic acid. [file 12937_2020_582_MOESM1_ESM.xlsx]

## Sheet: Sheet1
	Table S1. Significant and bi-allelic SNPs(p < 5×10-8) in GWAS of linoleic acid
	SNP	effect_allele	eaf	beta	pval	Chr	Position	Gene	F statiistic	Potential pleiotropic effect identified from PhenoScanner
	rs7080386	A	0.433	-0.25	6.8e-09	10	64718312	JMJD1C	33.7	Diastolic blood pressure
	rs10740118	C	0.44	-0.25	8.08e-09	10	64771213	JMJD1C	33.3	Diastolic blood pressure
	rs10761741	T	0.436	-0.25	8.77e-09	10	64736192	JMJD1C	33.2	Diastolic blood pressure
	rs7075195	A	0.568	0.25	9.02e-09	10	64720665	JMJD1C	33.1	Diastolic blood pressure
	rs10761731*	A	0.565	0.25	9.1e-09	10	64697616	JMJD1C	33.1	Diastolic blood pressure
	rs7897379	T	0.537	0.26	9.67e-09	10	64971731	REEP3	33	Diastolic blood pressure
	rs10761739	C	0.434	-0.25	9.78e-09	10	64732014	JMJD1C	33	Diastolic blood pressure
	rs7896518	A	0.56	0.25	1.07e-08	10	64774506	JMJD1C	32.7	Diastolic blood pressure
	rs2393986	A	0.52	0.25	2.67e-08	10	64990012	REEP3	31	Diastolic blood pressure
	rs10740134	T	0.522	0.25	2.87e-08	10	64985439	REEP3	30.8	Diastolic blood pressure
	rs10761784	A	0.525	0.25	3.01e-08	10	64978756	REEP3	30.7	Diastolic blood pressure
	rs7085018	T	0.528	0.24	3.16e-08	10	64956673	REEP3	30.7	Diastolic blood pressure
	rs7920036	T	0.529	0.24	3.59e-08	10	64963866	REEP3	30.4	Diastolic blood pressure
	rs10761771	T	0.519	0.23	3.69e-08	10	64900170	JMJD1C	30.3	Diastolic blood pressure
	rs10822163	C	0.501	0.24	3.91e-08	10	64794104	JMJD1C	30.2	Diastolic blood pressure
	rs2393977	A	0.513	0.24	4.04e-08	10	64917615	JMJD1C	30.2	Diastolic blood pressure
	rs7909960	A	0.483	-0.24	4.07e-08	10	64909183	JMJD1C	30.2	Diastolic blood pressure
	rs4454603	T	0.491	-0.23	4.25e-08	10	64682756	JMJD1C	30	Diastolic blood pressure
	rs10740129	A	0.482	-0.24	4.65e-08	10	64920814	JMJD1C	29.9	Diastolic blood pressure
	rs10761779	A	0.527	0.23	4.67e-08	10	64944933	REEP3	29.9	Diastolic blood pressure
	rs4486511	T	0.475	-0.23	4.68e-08	10	64934272	REEP3	29.8	Diastolic blood pressure
	rs10509189	T	0.525	0.23	4.69e-08	10	64934132	REEP3	29.8	Diastolic blood pressure
	rs9971352	A	0.526	0.23	4.7e-08	10	64935114	REEP3	29.9	Diastolic blood pressure
	rs12355784	A	0.491	-0.23	4.84e-08	10	64791571	JMJD1C	29.9	Diastolic blood pressure
	rs10761742	A	0.51	0.24	4.98e-08	10	64755054	JMJD1C	29.8	Diastolic blood pressure
	rs174550	T	0.676	-1.47	4.37e-274	11	61328054	FADS1	1344.5	HDL cholesterol,LDL cholesterol,Total cholesterol
	rs174547	T	0.677	-1.47	4.98e-274	11	61327359	FADS1	1343.5	HDL cholesterol,LDL cholesterol,Total cholesterol
	rs174535	T	0.675	-1.48	1.04e-273	11	61307932	C11orf9	1342.9
	rs174536	A	0.675	-1.48	1.09e-273	11	61308503	C11orf9	1342.1	HDL cholesterol,LDL cholesterol,Total cholesterol
	rs174546	T	0.323	1.47	2.13e-273	11	61326406	FADS1	1341.8	HDL cholesterol,LDL cholesterol,Total cholesterol
	rs174545	C	0.677	-1.47	4.37e-273	11	61325882	FADS1	1339.4	HDL cholesterol,LDL cholesterol,Total cholesterol
	rs1535	A	0.674	-1.46	4.47e-272	11	61354548	FADS2	1336	HDL cholesterol,LDL cholesterol,Total cholesterol
	rs174537	T	0.323	1.47	1.18e-271	11	61309256	C11orf9	1331.8	HDL cholesterol,LDL cholesterol,Total cholesterol
	rs102275	T	0.674	-1.46	3.01e-271	11	61314379	C11orf10	1329.1	HDL cholesterol,LDL cholesterol,Total cholesterol
	rs174574	A	0.329	1.46	1.9e-267	11	61356918	FADS2	1311.5	HDL cholesterol,LDL cholesterol,Total cholesterol
	rs174576	A	0.336	1.47	6.83e-266	11	61360086	FADS2	1306	HDL cholesterol,LDL cholesterol,Total cholesterol
	rs174578	A	0.338	1.47	2.61e-263	11	61362075	FADS2	1286.3	HDL cholesterol,LDL cholesterol,Total cholesterol
	rs174583	T	0.341	1.47	2.63e-263	11	61366326	FADS2	1288.6	HDL cholesterol,LDL cholesterol,Total cholesterol
	rs174577	A	0.336	1.46	1.73e-262	11	61361390	FADS2	1282.6	HDL cholesterol,LDL cholesterol,Total cholesterol
	rs174541	T	0.655	-1.45	4.9e-258	11	61322484	FADS1	1260.7	HDL cholesterol,LDL cholesterol,Total cholesterol
	rs4246215	T	0.344	1.45	1.19e-257	11	61320875	FEN1	1259	HDL cholesterol,LDL cholesterol,Total cholesterol
	rs174601	T	0.37	1.57	2.82e-253	11	61379716	FADS2	1235.5	HDL cholesterol,LDL cholesterol,Total cholesterol
	rs174528	T	0.637	-1.43	3.05e-249	11	61300075	C11orf9	1217	HDL cholesterol,LDL cholesterol,Total cholesterol
	rs174548	C	0.713	-1.42	2.14e-232	11	61327924	FADS1	1127	HDL cholesterol,LDL cholesterol,Total cholesterol
	rs174549	A	0.285	1.43	3.88e-232	11	61327958	FADS1	1123.3	HDL cholesterol,LDL cholesterol,Total cholesterol
	rs174555	T	0.713	-1.42	1.57e-231	11	61336336	FADS1	1120.6	HDL cholesterol,LDL cholesterol,Total cholesterol
	rs174538	A	0.291	1.43	4.21e-228	11	61316657	C11orf10	1104.2	HDL cholesterol,LDL cholesterol,Total cholesterol
	rs174556	T	0.287	1.39	2.43e-227	11	61337211	FADS1	1102.3	HDL cholesterol,LDL cholesterol,Total cholesterol
	rs174534	A	0.67	-1.37	1.89e-208	11	61306034	C11orf9	1002.8	HDL cholesterol,LDL cholesterol,Total cholesterol
	rs108499	T	0.331	1.38	2.36e-208	11	61303813	C11orf9	1002.3	HDL cholesterol,LDL cholesterol,Total cholesterol
	rs174570	T	0.128	1.56	9.98e-149	11	61353788	FADS2	702.3	HDL cholesterol,LDL cholesterol,Total cholesterol
	rs2727270	T	0.113	1.62	1.79e-142	11	61359813	FADS2	671.2	HDL cholesterol,LDL cholesterol,Total cholesterol
	rs2727271	A	0.887	-1.61	3.93e-142	11	61359934	FADS2	668.9	HDL cholesterol,LDL cholesterol,Total cholesterol
	rs2072114	A	0.881	-1.56	6.13e-141	11	61361791	FADS2	661.8	HDL cholesterol,LDL cholesterol,Total cholesterol
	rs2524299	A	0.885	-1.58	1.8e-138	11	61361358	FADS2	650.3	HDL cholesterol,LDL cholesterol,Total cholesterol
	rs2845573	A	0.922	-1.74	1.92e-116	11	61358484	FADS2	541.9	HDL cholesterol,LDL cholesterol,Total cholesterol
	rs174575	C	0.747	-1.09	4.07e-114	11	61358579	FADS2	531	HDL cholesterol,LDL cholesterol,Total cholesterol
	rs174448	A	0.642	-0.97	1.15e-111	11	61396149	FADS3	520.3	Total cholesterol
	rs174449	A	0.641	-0.96	3.37e-110	11	61396955	FADS3	512.7	HDL cholesterol,LDL cholesterol,Total cholesterol
	rs2526678	A	0.078	1.77	9.18e-106	11	61380369	FADS2	490.2	HDL cholesterol,LDL cholesterol,Total cholesterol
	rs422249	T	0.329	0.98	1.94e-103	11	61396064	FADS3	479.6	Total cholesterol
	rs2851682	A	0.917	-1.61	3.67e-103	11	61372588	FADS2	478	HDL cholesterol,LDL cholesterol,Total cholesterol
	rs174455	A	0.642	-0.93	1.17e-98	11	61412693	FADS3	456.4	HDL cholesterol,LDL cholesterol,Total cholesterol
	rs174532	A	0.312	-1.05	1.08e-89	11	61305450	C11orf9	412.4	LDL cholesterol,Total cholesterol
	rs174611	T	0.709	-0.93	1.51e-89	11	61384457	FADS2	412.5	HDL cholesterol,LDL cholesterol,Total cholesterol
	rs174605	T	0.279	0.92	2.07e-86	11	61383497	FADS2	397.2	HDL cholesterol,LDL cholesterol,Total cholesterol
	rs174591	A	0.279	1	2.31e-86	11	61374252	FADS2	396.3	HDL cholesterol,LDL cholesterol,Total cholesterol
	rs509360	A	0.326	-0.93	9.52e-82	11	61305135	C11orf9	375	HDL cholesterol
	rs149803	C	0.736	1.13	1.46e-80	11	61295596	C11orf9	368.3	Total cholesterol
	rs174616	A	0.461	0.79	1.24e-79	11	61385698	FADS2	365.1	HDL cholesterol,LDL cholesterol,Total cholesterol
	rs174450	T	0.532	-0.76	1.12e-74	11	61398118	FADS3	340.2	HDL cholesterol,LDL cholesterol,Total cholesterol
	rs174579	T	0.221	0.93	4.34e-72	11	61362189	FADS2	328	LDL cholesterol,Total cholesterol
	rs174626	A	0.548	-0.74	7.59e-71	11	61393633	FADS2	322.7	HDL cholesterol,LDL cholesterol,Total cholesterol
	rs174593	T	0.795	-1.05	1.58e-69	11	61375407	FADS2	315.8	LDL cholesterol,Total cholesterol
	rs174589	C	0.783	-0.94	1.76e-69	11	61372379	FADS2	316.6	LDL cholesterol,Total cholesterol
	rs174597	C	0.205	1.06	1.77e-69	11	61377616	FADS2	315.5	LDL cholesterol,Total cholesterol
	rs174468	A	0.431	-0.79	9.81e-64	11	61420267	RAB3IL1	289.3	LDL cholesterol,Total cholesterol
	rs2269928	T	0.789	-1.15	3.65e-62	11	61294105	C11orf9	281.3
	rs174476	T	0.426	-0.76	2.34e-60	11	61430694	RAB3IL1	272.6	Total cholesterol
	rs666870	A	0.426	-0.76	2.71e-60	11	61434055	RAB3IL1	272.5
	rs174478	T	0.575	0.76	2.84e-60	11	61435152	RAB3IL1	271.8
	rs526126	C	0.793	-1.05	5.34e-55	11	61381461	FADS2	247.2
	rs174634	C	0.744	-0.74	3.83e-52	11	61403963	FADS3	234	HDL cholesterol,Total cholesterol
	rs174456	A	0.745	-0.73	2.41e-51	11	61412758	FADS3	230.6	HDL cholesterol,Total cholesterol
	rs174464※	A	0.253	0.74	2.41e-51	11	61414502	FADS3	230.6
	rs1000778	A	0.257	0.72	3.1e-50	11	61411881	FADS3	224.6	HDL cholesterol,Total cholesterol
	rs412334	T	0.164	-0.98	6.24e-47	11	61316837	FEN1	209.2
	rs968567	T	0.163	0.76	7.59e-43	11	61352140	FADS2	190.3	Total cholesterol
	rs174479	C	0.816	-0.89	5.39e-41	11	61435330	RAB3IL1	181.6
	rs174627	A	0.163	0.7	2.04e-33	11	61394042	FADS2	146.3
	rs17764324	T	0.101	0.9	3.83e-32	11	61391664	FADS2	140.5
	rs17831757	T	0.899	-0.9	5.33e-32	11	61391776	FADS2	139.6
	rs11230815	C	0.899	-0.9	7.03e-32	11	61392702	FADS2	139	Total cholesterol
	rs17764935	A	0.054	1.49	1.23e-31	11	61421333	RAB3IL1	138
	rs7104849	A	0.899	-0.89	1.28e-31	11	61394620	FADS3	137.9
	rs7394871	A	0.047	1.58	2.94e-31	11	61409090	FADS3	136.2
	rs7482316	A	0.899	-0.86	6.41e-30	11	61396774	FADS3	130.1
	rs650436	T	0.453	-0.52	9.68e-29	11	61293006	C11orf9	124.6
	rs579383	A	0.539	0.49	2.81e-26	11	61293159	C11orf9	113.3
	rs198476	A	0.503	-0.44	2.94e-26	11	61282306	C11orf9	113.3
	rs198462	A	0.504	-0.44	3.97e-26	11	61280695	C11orf9	112.2
	rs198464	A	0.5	-0.44	5.05e-26	11	61278197	C11orf9	111.8
	rs7935946	T	0.052	1.18	8.16e-24	11	61372118	FADS2	101.8
	rs17156442	T	0.051	1.18	1.94e-21	11	61370599	FADS2	90.8
	rs569258	T	0.645	0.4	9.01e-21	11	61277244	C11orf9	87.9
	rs695867	A	0.963	-1.05	5.73e-20	11	61317864	FEN1	84.1
	rs198426	T	0.367	-0.39	2.43e-19	11	61247062	DAGLA	81.4
	rs2727266	A	0.926	-0.72	7.31e-17	11	61460910	BEST1	69.8
	rs2521568	C	0.074	0.72	7.39e-17	11	61457509	RAB3IL1	69.8
	rs1692120	A	0.471	-0.33	1.12e-14	11	61174048	DAGLA	59.7
	rs1800009	T	0.644	-0.34	1.63e-14	11	61486810	BEST1	59.1
	rs174472	A	0.576	-0.39	2.11e-14	11	61428532	RAB3IL1	58.7
	rs3758977	T	0.649	-0.34	3.81e-14	11	61493820	FTH1	57.3
	rs198473	A	0.751	-0.39	8.31e-14	11	61283132	C11orf9	56
	rs2028062	A	0.35	0.33	9.27e-14	11	61502529	FTH1	55.7
	rs198475	T	0.251	0.38	1.14e-13	11	61282647	C11orf9	55.2
	rs10792320	A	0.648	-0.33	1.44e-13	11	61502867	FTH1	54.8
	rs2727261	T	0.086	0.74	2.21e-13	11	61468707	BEST1	54
	rs2453710	A	0.545	0.31	1.35e-12	11	61163118	DAGLA	50.5
	rs198428	A	0.415	-0.31	1.79e-12	11	61246281	DAGLA	49.9
	rs2235093	A	0.47	-0.35	3.6e-12	11	61421698	RAB3IL1	48.4
	rs13966	T	0.475	-0.33	6.35e-12	11	61421568	RAB3IL1	47.3
	rs1109748	A	0.059	0.72	6.47e-12	11	61479221	BEST1	47.3
	rs2521572	T	0.054	0.86	7.49e-12	11	61468051	BEST1	47
	rs472031	A	0.1	-0.48	9.57e-12	11	61394996	FADS3	46.5
	rs482548	T	0.101	-0.46	3.26e-11	11	61389758	FADS2	44.1
	rs11230767	A	0.373	-0.28	7.59e-11	11	61183508	DAGLA	42.4
	rs11230766	A	0.626	0.28	9.91e-11	11	61183158	DAGLA	42
	rs198436	T	0.618	0.28	3.71e-10	11	61238622	DAGLA	39.4
	rs12794220	T	0.358	-0.27	5.14e-10	11	61218988	DAGLA	38.7
	rs4963466	C	0.718	-0.3	6.02e-10	11	61658702	INCENP	38.4
	rs3781974	A	0.284	0.29	6.65e-10	11	61663440	INCENP	38.3
	rs11230874	T	0.956	-0.82	1.07e-09	11	61552162	FTH1	37.3
	rs198456	A	0.38	-0.26	1.41e-09	11	61219964	DAGLA	36.6
	rs1460027	A	0.274	0.28	4.5e-09	11	61688511	INCENP	34.5
	rs10897208*	A	0.968	-0.79	4.58e-09	11	61548463	FTH1	34.4
	rs11230941	A	0.27	0.27	8.17e-09	11	61687373	INCENP	33.4
	rs12281961	T	0.684	0.27	8.5e-09	11	61161680	DAGLA	33.2
	rs2903922	A	0.271	0.27	9.25e-09	11	61685874	INCENP	33.1
	rs4335555	C	0.683	0.26	9.42e-09	11	61166755	DAGLA	33
	rs11230896	T	0.183	-0.33	1.04e-08	11	61607780	INCENP	32.8
	rs1812458	T	0.684	0.26	1.12e-08	11	61165025	DAGLA	32.6
	rs962371	T	0.684	0.26	1.17e-08	11	61164861	DAGLA	32.6
	rs12284414	A	0.309	-0.27	1.23e-08	11	61166038	DAGLA	32.5
	rs17626916	A	0.318	-0.26	1.44e-08	11	61160912	DAGLA	32.2
	rs760306	T	0.243	0.28	1.46e-08	11	61480868	BEST1	32.1
	rs10897169	A	0.319	-0.27	1.52e-08	11	61153899	SYT7	32.1
	rs12806760	A	0.319	-0.27	1.54e-08	11	61156214	DAGLA	32.1
	rs1692126	C	0.359	-0.26	2.87e-08	11	61156065	DAGLA	30.9
	rs2298823	C	0.735	-0.27	3.03e-08	11	61716395	SCGB1D1	30.7
	rs17156609#	A	0.03	0.82	4.09e-08	11	61488553	BEST1;FTH1	30.1
	rs1675102	T	0.259	0.26	4.29e-08	11	61710585	SCGB1D1	30.1
	rs17156618#	A	0.971	-0.82	4.61e-08	11	61501248	FTH1	29.9
	rs1136001	T	0.309	0.35	9.86e-16	16	15039475	NTAN1;PDXDC1	64.6
	rs6498540	A	0.691	-0.35	9.97e-16	16	15038095	PDXDC1	64.6
	rs1741	C	0.309	0.35	1e-15	16	15037852	PDXDC1	64.6
	rs1121	A	0.309	0.35	1.02e-15	16	15038577	PDXDC1	64.6
	rs1135999	A	0.691	-0.35	1.06e-15	16	15039463	NTAN1;PDXDC1	64.4
	rs2740	A	0.691	-0.35	1.1e-15	16	15039609	NTAN1;PDXDC1	64.4
	rs16966952	A	0.309	0.35	1.23e-15	16	15043444	NTAN1	64.2
	rs3803573	T	0.309	0.35	1.39e-15	16	15045914	NTAN1	64.1
	rs7200543	A	0.69	-0.35	1.42e-15	16	15037471	PDXDC1	64
	rs4985155	A	0.649	-0.34	2.85e-15	16	15036960	PDXDC1	62.7
	rs3198697	T	0.405	-0.35	3.27e-15	16	15037441	PDXDC1	62.3
	rs4985148	A	0.681	-0.34	1.21e-14	16	15055289	NTAN1	59.8
	rs4985124	T	0.688	-0.34	1.33e-14	16	15032942	PDXDC1	59.5
	rs4500751	T	0.32	0.34	1.47e-14	16	15047712	NTAN1	59.4
	*SNPs were not present in the LD reference panel.
	#SNPs were not avaiable for Ischemic stroke.
	※SNP was not avaiable for HDL cholesterol,LDL cholesterol and total cholesterol.

## Sheet: Sheet2
	Table S2.Significant and bi-allelic SNPs(p < 5×10-8) in GWAS of arachidonic acid
	SNP	effect_allele	eaf	beta	pval	Chr	Position	Gene	F statiistic	Potential pleiotropic effect identified from PhenoScanner
	rs1741	C	0.308	-0.2	1.64e-10	16	15037852	PDXDC1	41
	rs7200543	A	0.692	0.2	1.69e-10	16	15037471	PDXDC1	40.8
	rs6498540	A	0.692	0.2	1.7e-10	16	15038095	PDXDC1	40.9
	rs1121	A	0.308	-0.2	1.8e-10	16	15038577	PDXDC1	40.8
	rs1135999	A	0.692	0.2	2.06e-10	16	15039463	NTAN1;PDXDC1	40.5
	rs1136001	T	0.308	-0.2	2.1e-10	16	15039475	NTAN1;PDXDC1	40.5
	rs2740	A	0.692	0.2	2.12e-10	16	15039609	NTAN1;PDXDC1	40.5
	rs16966952	A	0.308	-0.2	2.43e-10	16	15043444	NTAN1	40.2
	rs3803573	T	0.308	-0.2	2.47e-10	16	15045914	NTAN1	40
	rs4985124	T	0.69	0.19	1.01e-09	16	15032942	PDXDC1	37.4
	rs4985148	A	0.683	0.19	1.49e-09	16	15055289	NTAN1	36.5
	rs4500751	T	0.319	-0.19	1.85e-09	16	15047712	NTAN1	36.2
	rs12926897	T	0.149	-0.26	6.36e-09	16	15034391	PDXDC1	33.8
	rs4985155	A	0.65	0.18	6.6e-09	16	15036960	PDXDC1	33.8
	rs174528	T	0.638	1.63	0	11	61300075	C11orf9	4732.1	HDL cholesterol,LDL cholesterol,Total cholesterol
	rs108499	T	0.33	-1.58	0	11	61303813	C11orf9	3841.9	HDL cholesterol,LDL cholesterol,Total cholesterol
	rs174534	A	0.672	1.57	0	11	61306034	C11orf9	3840.6	HDL cholesterol,LDL cholesterol,Total cholesterol
	rs174535	T	0.677	1.69	0	11	61307932	C11orf9	5874.2
	rs174536	A	0.678	1.69	0	11	61308503	C11orf9	5871.6	HDL cholesterol,LDL cholesterol,Total cholesterol
	rs174537	T	0.321	-1.69	0	11	61309256	C11orf9	5828.1	HDL cholesterol,LDL cholesterol,Total cholesterol
	rs102275	T	0.676	1.68	0	11	61314379	C11orf10	5774.4	HDL cholesterol,LDL cholesterol,Total cholesterol
	rs174538	A	0.288	-1.66	0	11	61316657	C11orf10	4725.4	HDL cholesterol,LDL cholesterol,Total cholesterol
	rs4246215	T	0.343	-1.66	0	11	61320875	FEN1	5126.1	HDL cholesterol,LDL cholesterol,Total cholesterol
	rs174541	T	0.657	1.67	0	11	61322484	FADS1	5151.7	HDL cholesterol,LDL cholesterol,Total cholesterol
	rs174545	C	0.679	1.69	0	11	61325882	FADS1	5831.7	HDL cholesterol,LDL cholesterol,Total cholesterol
	rs174546	T	0.321	-1.69	0	11	61326406	FADS1	5815.8	HDL cholesterol,LDL cholesterol,Total cholesterol
	rs174547	T	0.68	1.69	0	11	61327359	FADS1	5849.4	HDL cholesterol,LDL cholesterol,Total cholesterol
	rs174548	C	0.716	1.69	0	11	61327924	FADS1	5215.7	HDL cholesterol,LDL cholesterol,Total cholesterol
	rs174549	A	0.283	-1.69	0	11	61327958	FADS1	5181.8	HDL cholesterol,LDL cholesterol,Total cholesterol
	rs174550	T	0.679	1.69	0	11	61328054	FADS1	5852	HDL cholesterol,LDL cholesterol,Total cholesterol
	rs174555	T	0.716	1.68	0	11	61336336	FADS1	5170	HDL cholesterol,LDL cholesterol,Total cholesterol
	rs174556	T	0.284	-1.65	0	11	61337211	FADS1	5005.4	HDL cholesterol,LDL cholesterol,Total cholesterol
	rs174570	T	0.126	-1.54	0	11	61353788	FADS2	1852.5	HDL cholesterol,LDL cholesterol,Total cholesterol
	rs1535	A	0.676	1.68	0	11	61354548	FADS2	5713.3	HDL cholesterol,LDL cholesterol,Total cholesterol
	rs174574	A	0.326	-1.68	0	11	61356918	FADS2	5681.1	HDL cholesterol,LDL cholesterol,Total cholesterol
	rs174575	C	0.748	1.34	0	11	61358579	FADS2	2260.2	HDL cholesterol,LDL cholesterol,Total cholesterol
	rs2727270	T	0.112	-1.62	0	11	61359813	FADS2	1922.2	HDL cholesterol,LDL cholesterol,Total cholesterol
	rs2727271	A	0.887	1.62	0	11	61359934	FADS2	1915.2	HDL cholesterol,LDL cholesterol,Total cholesterol
	rs174576	A	0.333	-1.69	0	11	61360086	FADS2	5613.9	HDL cholesterol,LDL cholesterol,Total cholesterol
	rs2524299	A	0.885	1.58	0	11	61361358	FADS2	1833.4	HDL cholesterol,LDL cholesterol,Total cholesterol
	rs174577	A	0.334	-1.68	0	11	61361390	FADS2	5515.5	HDL cholesterol,LDL cholesterol,Total cholesterol
	rs2072114	A	0.882	1.56	0	11	61361791	FADS2	1845	HDL cholesterol,LDL cholesterol,Total cholesterol
	rs174578	A	0.335	-1.69	0	11	61362075	FADS2	5507.8	HDL cholesterol,LDL cholesterol,Total cholesterol
	rs174583	T	0.338	-1.68	0	11	61366326	FADS2	5397.2	HDL cholesterol,LDL cholesterol,Total cholesterol
	rs174591	A	0.278	-1.33	0	11	61374252	FADS2	1840.1	HDL cholesterol,LDL cholesterol,Total cholesterol
	rs174601	T	0.367	-1.79	0	11	61379716	FADS2	4870.4	HDL cholesterol,LDL cholesterol,Total cholesterol
	rs2845573	A	0.924	1.73	1.12e-306	11	61358484	FADS2	1520.8	HDL cholesterol,LDL cholesterol,Total cholesterol
	rs174579	T	0.219	-1.22	4.95e-301	11	61362189	FADS2	1493.8	LDL cholesterol,Total cholesterol
	rs174448	A	0.641	1.08	2.03e-292	11	61396149	FADS3	1447.9	Total cholesterol
	rs174449	A	0.64	1.07	2.2e-288	11	61396955	FADS3	1417.7	HDL cholesterol,LDL cholesterol,Total cholesterol
	rs422249	T	0.329	-1.12	9.09e-286	11	61396064	FADS3	1413.2	Total cholesterol
	rs174589	C	0.785	1.23	6.13e-281	11	61372379	FADS2	1385.4	LDL cholesterol,Total cholesterol
	rs2851682	A	0.92	1.63	1.02e-280	11	61372588	FADS2	1381.8	HDL cholesterol,LDL cholesterol,Total cholesterol
	rs2526678	A	0.076	-1.77	5.29e-280	11	61380369	FADS2	1380.4	HDL cholesterol,LDL cholesterol,Total cholesterol
	rs174593	T	0.797	1.34	3.87e-268	11	61375407	FADS2	1315.1	LDL cholesterol,Total cholesterol
	rs174597	C	0.203	-1.35	5.45e-268	11	61377616	FADS2	1316.3	LDL cholesterol,Total cholesterol
	rs174611	T	0.711	1.09	1.31e-264	11	61384457	FADS2	1299.4	HDL cholesterol,LDL cholesterol,Total cholesterol
	rs174605	T	0.277	-1.08	2.6e-256	11	61383497	FADS2	1252.2	HDL cholesterol,LDL cholesterol,Total cholesterol
	rs174455	A	0.64	1.03	7.51e-255	11	61412693	FADS3	1247.1	HDL cholesterol,LDL cholesterol,Total cholesterol
	rs509360	A	0.326	1.12	7.08e-251	11	61305135	C11orf9	1222.4	HDL cholesterol
	rs968567	T	0.162	-1.14	1.16e-226	11	61352140	FADS2	1097.8	Total cholesterol
	rs2269928	T	0.788	1.42	3.13e-211	11	61294105	C11orf9	1016.8
	rs174616	A	0.459	-0.89	1.46e-208	11	61385698	FADS2	1001.6	HDL cholesterol,LDL cholesterol,Total cholesterol
	rs526126	C	0.794	1.36	2.47e-207	11	61381461	FADS2	998.6
	rs174450	T	0.53	0.84	1.58e-186	11	61398118	FADS3	892	HDL cholesterol,LDL cholesterol,Total cholesterol
	rs174532	A	0.314	1.06	1.23e-184	11	61305450	C11orf9	879.3	LDL cholesterol,Total cholesterol
	rs174626	A	0.55	0.84	9.57e-184	11	61393633	FADS2	878.1	HDL cholesterol,LDL cholesterol,Total cholesterol
	rs149803	C	0.733	-1.16	4.36e-171	11	61295596	C11orf9	812.2	Total cholesterol
	rs174634	C	0.741	0.87	3.6e-152	11	61403963	FADS3	720.3	HDL cholesterol,Total cholesterol
	rs174464※	A	0.256	-0.88	5.8e-152	11	61414502	FADS3	719.1
	rs174456	A	0.742	0.87	1.56e-150	11	61412758	FADS3	709.3	HDL cholesterol,Total cholesterol
	rs1000778	A	0.259	-0.86	1.33e-148	11	61411881	FADS3	703	HDL cholesterol,Total cholesterol
	rs174468	A	0.432	0.8	1.96e-129	11	61420267	RAB3IL1	607	LDL cholesterol,Total cholesterol
	rs174627	A	0.161	-0.96	3.04e-127	11	61394042	FADS2	594.2
	rs174476	T	0.427	0.78	2.56e-121	11	61430694	RAB3IL1	566.6	Total cholesterol
	rs666870	A	0.427	0.78	3.11e-121	11	61434055	RAB3IL1	566.9
	rs174479	C	0.812	1.06	3.16e-121	11	61435330	RAB3IL1	565.3
	rs174478	T	0.573	-0.78	7.24e-121	11	61435152	RAB3IL1	562.5
	rs412334	T	0.163	0.99	2.28e-89	11	61316837	FEN1	410.8
	rs7394871	A	0.046	-1.53	9.42e-73	11	61409090	FADS3	331.8
	rs17764935	A	0.053	-1.43	2.22e-70	11	61421333	RAB3IL1	320.3
	rs198462	A	0.506	0.49	1.16e-60	11	61280695	C11orf9	274.8
	rs198476	A	0.505	0.49	1.94e-60	11	61282306	C11orf9	272.2
	rs198464	A	0.502	0.48	5.47e-59	11	61278197	C11orf9	266.7
	rs17764324	T	0.1	-0.83	3.09e-58	11	61391664	FADS2	262.6
	rs17831757	T	0.9	0.82	6.28e-58	11	61391776	FADS2	260.7
	rs11230815	C	0.9	0.82	1.01e-57	11	61392702	FADS2	260.7	Total cholesterol
	rs650436	T	0.454	0.54	1.75e-57	11	61293006	C11orf9	259.6
	rs7104849	A	0.9	0.82	3.13e-57	11	61394620	FADS3	257.9
	rs7935946	T	0.052	-1.16	6.62e-56	11	61372118	FADS2	251.7
	rs7482316	A	0.9	0.78	8.58e-54	11	61396774	FADS3	242.2
	rs17156442	T	0.051	-1.16	7.09e-53	11	61370599	FADS2	237.7
	rs579383	A	0.538	-0.51	7.42e-52	11	61293159	C11orf9	232.4
	rs198473	A	0.748	0.49	8.18e-41	11	61283132	C11orf9	181.1
	rs198475	T	0.254	-0.48	1.74e-40	11	61282647	C11orf9	178.9
	rs2727266	A	0.925	0.76	1.2e-37	11	61460910	BEST1	166.2
	rs2521568	C	0.075	-0.76	1.4e-37	11	61457509	RAB3IL1	165.7
	rs695867	A	0.963	0.9	2.85e-37	11	61317864	FEN1	164.2
	rs1692120	A	0.474	0.38	2.26e-35	11	61174048	DAGLA	155
	rs569258	T	0.642	-0.38	3.27e-34	11	61277244	C11orf9	150.4
	rs1800009	T	0.644	0.37	2.86e-32	11	61486810	BEST1	140.7
	rs3758977	T	0.649	0.37	3.56e-32	11	61493820	FTH1	140.8
	rs2028062	A	0.351	-0.37	1.55e-31	11	61502529	FTH1	137.8
	rs10792320	A	0.647	0.37	1.59e-31	11	61502867	FTH1	137.4
	rs198426	T	0.368	0.36	1.38e-30	11	61247062	DAGLA	132.9
	rs2521572	T	0.054	-0.9	2e-29	11	61468051	BEST1	127.8
	rs2453710	A	0.543	-0.35	1.08e-28	11	61163118	DAGLA	124.5
	rs174472	A	0.576	0.4	1.48e-28	11	61428532	RAB3IL1	123.8
	rs2727261	T	0.086	-0.71	7.88e-28	11	61468707	BEST1	120.3
	rs472031	A	0.099	0.51	2.34e-27	11	61394996	FADS3	118.4
	rs1109748	A	0.06	-0.71	7.4e-27	11	61479221	BEST1	115.9
	rs482548	T	0.101	0.49	2.53e-26	11	61389758	FADS2	113.4
	rs2235093	A	0.475	0.36	1.28e-24	11	61421698	RAB3IL1	105.7
	rs13966	T	0.479	0.35	5.36e-24	11	61421568	RAB3IL1	102.8
	rs198446※	A	0.246	-0.34	6.48e-21	11	61259957	DAGLA	88.4
	rs198428	A	0.417	0.29	1.11e-19	11	61246281	DAGLA	82.8
	rs198418	A	0.757	0.32	2.01e-19	11	61252848	DAGLA	81.7
	rs198425	A	0.757	0.32	2.8e-19	11	61248007	DAGLA	81
	rs81658	A	0.243	-0.32	3.82e-19	11	61244520	DAGLA	80.3
	rs198430	A	0.245	-0.31	8.71e-19	11	61244266	DAGLA	78.7
	rs11230767	A	0.375	0.27	9.5e-19	11	61183508	DAGLA	78.5
	rs11230766	A	0.624	-0.27	1.86e-18	11	61183158	DAGLA	77.2
	rs11230896	T	0.183	0.36	1.69e-17	11	61607780	INCENP	72.7
	rs17633020	A	0.247	-0.3	1.7e-17	11	61501457	FTH1	72.6
	rs17185574	T	0.754	0.29	2.12e-17	11	61502270	FTH1	72.5
	rs1791785	T	0.262	-0.28	9.24e-16	11	61199389	DAGLA	64.9
	rs540613	T	0.176	0.4	1.19e-15	11	61437446	RAB3IL1	64.3
	rs198436	T	0.615	-0.25	2.1e-15	11	61238622	DAGLA	63.2
	rs760306	T	0.24	-0.28	2.42e-15	11	61480868	BEST1	62.8
	rs198435	C	0.103	0.44	3.03e-15	11	61239900	DAGLA	62.4
	rs198456	A	0.383	0.24	5.81e-15	11	61219964	DAGLA	61.2
	rs6591657	T	0.099	0.4	8.04e-15	11	61191108	DAGLA	60.4
	rs12794220	T	0.362	0.25	8.2e-15	11	61218988	DAGLA	60.4
	rs387137	C	0.4	-0.26	1.66e-14	11	61586745	INCENP	59.2
	rs198432	A	0.257	-0.26	3.31e-14	11	61241557	DAGLA	57.7
	rs2132390	T	0.099	0.39	5.78e-14	11	61181571	DAGLA	56.7
	rs2453712	T	0.1	0.39	7.69e-14	11	61169904	DAGLA	56
	rs4335555	C	0.682	-0.24	1.08e-13	11	61166755	DAGLA	55.2
	rs741886	T	0.073	-0.45	1.32e-13	11	61481363	BEST1	55
	rs1812458	T	0.682	-0.24	1.57e-13	11	61165025	DAGLA	54.7
	rs12281961	T	0.683	-0.24	1.66e-13	11	61161680	DAGLA	54.4
	rs962371	T	0.682	-0.24	1.98e-13	11	61164861	DAGLA	54.4
	rs12284414	A	0.311	0.24	2.17e-13	11	61166038	DAGLA	53.9
	rs17626916	A	0.32	0.24	2.74e-13	11	61160912	DAGLA	53.6
	rs4313591	T	0.615	0.23	3.83e-13	11	61523145	FTH1	53
	rs4963441	C	0.611	0.23	4.01e-13	11	61525215	FTH1	52.8
	rs4963442	T	0.611	0.23	4.04e-13	11	61525282	FTH1	52.8
	rs7937198	A	0.611	0.23	4.14e-13	11	61525549	FTH1	52.7
	rs195162	T	0.928	0.44	4.97e-13	11	61481090	BEST1	52.4
	rs195445	T	0.696	-0.26	5.33e-13	11	61500918	FTH1	52.3
	rs195165	A	0.928	0.44	5.74e-13	11	61479414	BEST1	52.1
	rs12806760	A	0.32	0.24	6.52e-13	11	61156214	DAGLA	51.9
	rs10897169	A	0.32	0.24	6.88e-13	11	61153899	SYT7	51.6
	rs12285167	A	0.199	-0.28	1.05e-12	11	61248615	DAGLA	50.8
	rs11230874	T	0.956	0.63	3.85e-12	11	61552162	FTH1	48.3
	rs7105652	A	0.313	0.24	4.32e-12	11	61505910	FTH1	48
	rs17156609#	A	0.03	-0.73	4.97e-12	11	61488553	BEST1;FTH1	47.8
	rs2903922	A	0.272	-0.23	5.7e-12	11	61685874	INCENP	47.5
	rs195160	T	0.086	-0.4	5.92e-12	11	61482673	BEST1	47.5
	rs11230941	A	0.271	-0.23	6.33e-12	11	61687373	INCENP	47.4
	rs1692126	C	0.361	0.22	7.15e-12	11	61156065	DAGLA	47.2
	rs1460027	A	0.275	-0.23	7.52e-12	11	61688511	INCENP	47
	rs198453	T	0.255	-0.24	1.04e-11	11	61221126	DAGLA	46.3
	rs12420642	A	0.278	-0.23	1.27e-11	11	61728427	SCGB2A1	45.9
	rs1729374	A	0.278	-0.23	1.46e-11	11	61726006	SCGB2A1	45.6
	rs1729372	A	0.722	0.23	1.5e-11	11	61725587	SCGB2A1	45.6
	rs17156618#	A	0.971	0.72	1.61e-11	11	61501248	FTH1	45.5
	rs17827918	A	0.103	-0.42	1.63e-11	11	61224741	DAGLA	45.5
	rs3825036	A	0.144	0.29	1.81e-11	11	61273052	DAGLA	45.4
	rs1675105	A	0.277	-0.23	1.89e-11	11	61720191	SCGB1D1	45.3
	rs1792876	A	0.277	-0.23	1.9e-11	11	61720208	SCGB1D1	45.1
	rs3781974	A	0.286	-0.23	2.06e-11	11	61663440	INCENP	44.9
	rs3931642	A	0.221	-0.25	2.22e-11	11	61219000	DAGLA	44.8
	rs2240287	A	0.144	0.29	2.3e-11	11	61262159	DAGLA	44.9
	rs195157	A	0.916	0.4	2.34e-11	11	61484367	BEST1	44.7
	rs4963466	C	0.716	0.23	2.49e-11	11	61658702	INCENP	44.7
	rs12789285	C	0.765	-0.25	3.52e-11	11	61536564	FTH1	43.9
	rs2238003	T	0.242	-0.25	3.78e-11	11	61280311	C11orf9	43.7
	rs10897213	T	0.598	-0.21	5.56e-11	11	61584324	INCENP	43
	rs4963243	A	0.145	0.28	5.58e-11	11	61250903	DAGLA	43
	rs9735635	A	0.145	0.28	5.64e-11	11	61247456	DAGLA	43.1
	rs7112985	C	0.402	0.21	5.69e-11	11	61584491	INCENP	43.1
	rs7946441	C	0.402	0.21	6.22e-11	11	61585551	INCENP	42.8
	rs2446738	T	0.594	-0.22	6.82e-11	11	61583398	INCENP	42.7
	rs12274157	A	0.824	-0.28	7.11e-11	11	61234223	DAGLA	42.6
	rs2298823	C	0.733	0.23	7.55e-11	11	61716395	SCGB1D1	42.5
	rs449397	A	0.402	0.21	8.09e-11	11	61586371	INCENP	42.2
	rs429416	T	0.402	0.21	8.19e-11	11	61586505	INCENP	42.2
	rs10897208*	A	0.969	0.59	9.06e-11	11	61548463	FTH1	42.1
	rs7951604	A	0.228	0.24	1.14e-10	11	61541403	FTH1	41.8
	rs11605994	T	0.238	0.24	1.18e-10	11	61527415	FTH1	41.6
	rs6591687	T	0.229	0.24	1.48e-10	11	61539224	FTH1	41.1
	rs1692116	A	0.14	0.28	2.34e-10	11	61165823	DAGLA	40.2
	rs12365974	T	0.296	0.24	5.71e-10	11	61613343	INCENP	38.6
	rs10897221	T	0.26	-0.21	6.15e-10	11	61695695	INCENP	38.4
	rs4963444	A	0.033	-0.56	6.31e-10	11	61529918	FTH1	38.3
	rs11230751	A	0.305	0.22	7.27e-10	11	61137480	SYT7	38.1
	rs1675102	T	0.261	-0.21	8.25e-10	11	61710585	SCGB1D1	37.7
	rs2727269	A	0.527	-0.2	8.27e-10	11	61467398	BEST1	37.9
	rs2524287	A	0.306	-0.23	8.49e-10	11	61441126	RAB3IL1	37.7
	rs11230889	A	0.825	0.29	9.31e-10	11	61579962	INCENP	37.5
	rs195156	T	0.923	0.41	1.1e-09	11	61485639	BEST1	37.2
	rs7925016	T	0.793	-0.23	1.4e-09	11	61800505	SCGB2A2	36.7
	rs4423188	A	0.298	-0.2	1.61e-09	11	61522994	FTH1	36.5
	rs198444	A	0.424	-0.19	2.15e-09	11	61261744	DAGLA	35.9
	rs883724	T	0.144	0.25	2.43e-09	11	61214433	DAGLA	35.7
	rs11827215	A	0.144	0.25	2.54e-09	11	61215171	DAGLA	35.6
	rs4963308	A	0.144	0.25	2.67e-09	11	61213002	DAGLA	35.4
	rs879486	T	0.338	-0.18	2.77e-09	11	61231809	DAGLA	35.3
	rs195446	T	0.325	0.2	2.83e-09	11	61499542	FTH1	35.3
	rs3889277	C	0.038	0.54	3.28e-09	11	61935397	SCGB1A1	35
	rs3899187	A	0.955	0.43	3.76e-09	11	61640453	INCENP	34.8
	rs17707648	A	0.047	-0.4	9.88e-09	11	61647388	INCENP	32.9
	rs2238001	T	0.879	-0.29	1.32e-08	11	61281083	C11orf9	32.4
	rs10736716	C	0.35	-0.18	1.32e-08	11	61521709	FTH1	32.3
	rs4144907	C	0.047	-0.39	1.71e-08	11	61647926	INCENP	31.8
	rs972355	C	0.305	-0.18	3.56e-08	11	61473913	BEST1	30.4
	rs1800007	T	0.695	0.18	3.69e-08	11	61475963	BEST1	30.4
	rs3741259	T	0.104	-0.31	4.5e-08	11	61038926	SYT7	29.9
	rs17663676	T	0.966	-0.47	4.52e-08	11	61957578	AHNAK	30
	rs12788265	C	0.038	0.47	4.88e-08	11	61956342	AHNAK	29.8
	rs16829840	T	0.014	0.46	2.53e-08	3	120630648	TMEM39A	31.1
	*SNP was not present in the LD reference panel.
	#SNPs were not avaiable for Ischemic stroke.
	※SNPs were not avaiable for HDL cholesterol,LDL cholesterol and total cholesterol.

## Sheet: Sheet3
	Table S3.Significant and bi-allelic SNPs(p < 5×10-8) in GWAS of a-linolenic acid
	SNP	effect_allele	beta	pval	Chr	Position	Gene	F statiistic	Potential pleiotropic effect identified from PhenoScanner
	rs174547	T	-0.0159	3.47e-64	11	61327359	FADS1	317.6	HDL cholesterol,LDL cholesterol,Total cholesterol
	rs174550	T	-0.0159	5.61e-64	11	61328054	FADS1	317.6	HDL cholesterol,LDL cholesterol,Total cholesterol
	rs102275	T	-0.0158	7.38e-64	11	61314379	C11orf10	313.5	HDL cholesterol,LDL cholesterol,Total cholesterol
	rs174536	A	-0.0159	1e-63	11	61308503	C11orf9	317.6	HDL cholesterol,LDL cholesterol,Total cholesterol
	rs174537	T	0.0159	1.04e-63	11	61309256	C11orf9	317.6	HDL cholesterol,LDL cholesterol,Total cholesterol
	rs174535	T	-0.0159	1.05e-63	11	61307932	C11orf9	317.6
	rs174545	C	-0.0158	1.41e-63	11	61325882	FADS1	313.5	HDL cholesterol,LDL cholesterol,Total cholesterol
	rs174546	T	0.0158	1.7e-63	11	61326406	FADS1	313.5	HDL cholesterol,LDL cholesterol,Total cholesterol
	rs1535	A	-0.0157	3e-63	11	61354548	FADS2	309.5	HDL cholesterol,LDL cholesterol,Total cholesterol
	rs174574	A	0.0156	2.76e-62	11	61356918	FADS2	305.5	HDL cholesterol,LDL cholesterol,Total cholesterol
	rs174577	A	0.0155	1.09e-60	11	61361390	FADS2	301.6	HDL cholesterol,LDL cholesterol,Total cholesterol
	rs174576	A	0.0156	1.17e-60	11	61360086	FADS2	305.5	HDL cholesterol,LDL cholesterol,Total cholesterol
	rs174583	T	0.0155	2.13e-60	11	61366326	FADS2	301.6	HDL cholesterol,LDL cholesterol,Total cholesterol
	rs174541	T	-0.0155	3.69e-60	11	61322484	FADS1	301.6	HDL cholesterol,LDL cholesterol,Total cholesterol
	rs174578	A	0.0155	4.82e-60	11	61362075	FADS2	243.5	HDL cholesterol,LDL cholesterol,Total cholesterol
	rs4246215	T	0.0154	8.59e-60	11	61320875	FEN1	297.6	HDL cholesterol,LDL cholesterol,Total cholesterol
	rs174528	T	-0.0155	3.24e-59	11	61300075	C11orf9	243.5	HDL cholesterol,LDL cholesterol,Total cholesterol
	rs174548	C	-0.0159	8.21e-59	11	61327924	FADS1	256.4	HDL cholesterol,LDL cholesterol,Total cholesterol
	rs174549	A	0.0159	1.88e-58	11	61327958	FADS1	256.4	HDL cholesterol,LDL cholesterol,Total cholesterol
	rs174555	T	-0.0158	4.95e-58	11	61336336	FADS1	253.1	HDL cholesterol,LDL cholesterol,Total cholesterol
	rs174556	T	0.0155	4.65e-57	11	61337211	FADS1	243.5	HDL cholesterol,LDL cholesterol,Total cholesterol
	rs174601	T	0.0162	7.15e-57	11	61379716	FADS2	266.3	HDL cholesterol,LDL cholesterol,Total cholesterol
	rs174538	A	0.0154	1.39e-54	11	61316657	C11orf10	240.3	HDL cholesterol,LDL cholesterol,Total cholesterol
	rs174534	A	-0.0147	2.7e-50	11	61306034	C11orf9	218.7	HDL cholesterol,LDL cholesterol,Total cholesterol
	rs108499	T	0.0148	4.16e-50	11	61303813	C11orf9	221.7	HDL cholesterol,LDL cholesterol,Total cholesterol
	rs174570	T	0.0157	9.04e-34	11	61353788	FADS2	147	HDL cholesterol,LDL cholesterol,Total cholesterol
	rs174575	C	-0.0121	8.94e-31	11	61358579	FADS2	147.6	HDL cholesterol,LDL cholesterol,Total cholesterol
	rs2727270	T	0.0159	3.52e-30	11	61359813	FADS2	129.9	HDL cholesterol,LDL cholesterol,Total cholesterol
	rs2727271	A	-0.0159	4.97e-30	11	61359934	FADS2	129.9	HDL cholesterol,LDL cholesterol,Total cholesterol
	rs2524299	A	-0.0155	3.34e-29	11	61361358	FADS2	123.4	HDL cholesterol,LDL cholesterol,Total cholesterol
	rs2072114	A	-0.015	2.41e-28	11	61361791	FADS2	115.5	HDL cholesterol,LDL cholesterol,Total cholesterol
	rs174591	A	0.0116	1.21e-26	11	61374252	FADS2	111.9	HDL cholesterol,LDL cholesterol,Total cholesterol
	rs174448	A	-0.0094	3.86e-25	11	61396149	FADS3	109.7	Total cholesterol
	rs174449	A	-0.0094	7.61e-25	11	61396955	FADS3	109.7	HDL cholesterol,LDL cholesterol,Total cholesterol
	rs2845573	A	-0.0168	2.79e-24	11	61358484	FADS2	110.9	HDL cholesterol,LDL cholesterol,Total cholesterol
	rs174455	A	-0.0094	5.9e-24	11	61412693	FADS3	109.7	HDL cholesterol,LDL cholesterol,Total cholesterol
	rs174602	T	-0.0158	1.82e-23	11	61380990	FADS2	98	Total cholesterol
	rs509360	A	-0.011	3.22e-23	11	61305135	C11orf9	100.5	HDL cholesterol
	rs2851682	A	-0.0162	3.34e-23	11	61372588	FADS2	103.1	HDL cholesterol,LDL cholesterol,Total cholesterol
	rs422249	T	0.0094	8.27e-23	11	61396064	FADS3	88.8	Total cholesterol
	rs2526678	A	0.0172	1.88e-22	11	61380369	FADS2	91.8	HDL cholesterol,LDL cholesterol,Total cholesterol
	rs174579	T	0.0106	7.56e-21	11	61362189	FADS2	93.3	LDL cholesterol,Total cholesterol
	rs174532	A	-0.0114	1.31e-20	11	61305450	C11orf9	90.7	LDL cholesterol,Total cholesterol
	rs174593	T	-0.0115	1.37e-19	11	61375407	FADS2	78.6	LDL cholesterol,Total cholesterol
	rs174616	A	0.0079	1.43e-19	11	61385698	FADS2	77.4	HDL cholesterol,LDL cholesterol,Total cholesterol
	rs174597	C	0.0116	1.44e-19	11	61377616	FADS2	80	LDL cholesterol,Total cholesterol
	rs174611	T	-0.0088	2.66e-19	11	61384457	FADS2	77.8	HDL cholesterol,LDL cholesterol,Total cholesterol
	rs149803	C	0.0121	8.04e-19	11	61295596	C11orf9	75	Total cholesterol
	rs174605	T	0.0086	5.59e-18	11	61383497	FADS2	74.3	HDL cholesterol,LDL cholesterol,Total cholesterol
	rs174450	T	-0.0076	8.27e-18	11	61398118	FADS3	71.6	HDL cholesterol,LDL cholesterol,Total cholesterol
	rs174626	A	-0.0074	5.51e-17	11	61393633	FADS2	67.8	HDL cholesterol,LDL cholesterol,Total cholesterol
	rs2269928	T	-0.0123	1.22e-16	11	61294105	C11orf9	67.5
	rs174634	C	-0.0077	3.2e-14	11	61403963	FADS3	59.5	HDL cholesterol,Total cholesterol
	rs968567	T	0.0093	4.43e-14	11	61352140	FADS2	60.3	Total cholesterol
	rs174464*	A	0.0076	7.61e-14	11	61414502	FADS3	57.9
	rs412334	T	-0.0118	9.72e-14	11	61316837	FEN1	54.5
	rs174456	A	-0.0076	1.09e-13	11	61412758	FADS3	57.9	HDL cholesterol,Total cholesterol
	rs1000778	A	0.0074	1.13e-13	11	61411881	FADS3	54.9	HDL cholesterol,Total cholesterol
	rs174468	A	-0.0076	1.11e-12	11	61420267	RAB3IL1	47.9	LDL cholesterol,Total cholesterol
	rs526126	C	-0.0105	1.34e-12	11	61381461	FADS2	49.1
	rs174478	T	0.0074	3.3e-12	11	61435152	RAB3IL1	45.4
	rs174476	T	-0.0074	3.48e-12	11	61430694	RAB3IL1	45.4	Total cholesterol
	rs666870	A	-0.0074	3.54e-12	11	61434055	RAB3IL1	45.4
	rs174589	C	-0.0077	2.23e-11	11	61372379	FADS2	49.1	LDL cholesterol,Total cholesterol
	rs198464	A	-0.0057	2.48e-11	11	61278197	C11orf9	40.2
	rs198462	A	-0.0057	3.33e-11	11	61280695	C11orf9	40.2
	rs198476	A	-0.0058	3.56e-11	11	61282306	C11orf9	41.6
	rs740006	T	0.0163	1.32e-10	11	61314444	C11orf10	42.6
	rs17762402	A	-0.0186	1.56e-10	11	61309777	C11orf9	41.2
	rs650436	T	-0.0062	1.87e-10	11	61293006	C11orf9	38.5
	rs579383	A	0.0058	1.02e-09	11	61293159	C11orf9	33.7
	rs174627	A	0.0072	2.62e-09	11	61394042	FADS2	36.1
	rs174479	C	-0.0089	2.85e-09	11	61435330	RAB3IL1	35.3
	rs1692120	A	-0.0051	1.41e-08	11	61174048	DAGLA	32.2
	*SNP was not avaiable for HDL cholesterol,LDL cholesterol and total cholesterol.

## Sheet: Sheet4
	Table S4.Significant and bi-allelic SNPs(p < 5×10-8) in GWAS of eicosapentaenoic acid
	SNP	effect_allele	beta	pval	Chr	Position	Gene	F statiistic	Potential pleiotropic effect identified from PhenoScanner
	rs174538	A	-0.0834	5.37e-58	11	61316657	C11orf10	260.9	HDL cholesterol,LDL cholesterol,Total cholesterol
	rs174535	T	0.0822	6.03e-58	11	61307932	C11orf9	263.6
	rs174536	A	0.0822	6.68e-58	11	61308503	C11orf9	263.6	HDL cholesterol,LDL cholesterol,Total cholesterol
	rs174537	T	-0.0819	1.01e-57	11	61309256	C11orf9	261.6	HDL cholesterol,LDL cholesterol,Total cholesterol
	rs174550	T	0.0821	1.08e-57	11	61328054	FADS1	262.9	HDL cholesterol,LDL cholesterol,Total cholesterol
	rs174547	T	0.082	1.83e-57	11	61327359	FADS1	262.3	HDL cholesterol,LDL cholesterol,Total cholesterol
	rs174546	T	-0.0818	2.68e-57	11	61326406	FADS1	261	HDL cholesterol,LDL cholesterol,Total cholesterol
	rs102275	T	0.0815	3.79e-57	11	61314379	C11orf10	259	HDL cholesterol,LDL cholesterol,Total cholesterol
	rs174545	C	0.0817	4.77e-57	11	61325882	FADS1	260.3	HDL cholesterol,LDL cholesterol,Total cholesterol
	rs174541	T	0.0812	3.11e-55	11	61322484	FADS1	247.2	HDL cholesterol,LDL cholesterol,Total cholesterol
	rs174574	A	-0.0802	4.03e-55	11	61356918	FADS2	250.7	HDL cholesterol,LDL cholesterol,Total cholesterol
	rs4246215	T	-0.0811	5.96e-55	11	61320875	FEN1	246.6	HDL cholesterol,LDL cholesterol,Total cholesterol
	rs1535	A	0.0798	6.46e-55	11	61354548	FADS2	248.2	HDL cholesterol,LDL cholesterol,Total cholesterol
	rs174556	T	-0.0812	6.76e-55	11	61337211	FADS1	247.2	HDL cholesterol,LDL cholesterol,Total cholesterol
	rs174576	A	-0.0806	1.7e-54	11	61360086	FADS2	243.5	HDL cholesterol,LDL cholesterol,Total cholesterol
	rs174577	A	-0.0804	2.44e-54	11	61361390	FADS2	242.3	HDL cholesterol,LDL cholesterol,Total cholesterol
	rs174578	A	-0.0806	2.81e-54	11	61362075	FADS2	243.5	HDL cholesterol,LDL cholesterol,Total cholesterol
	rs174583	T	-0.0804	6.52e-54	11	61366326	FADS2	242.3	HDL cholesterol,LDL cholesterol,Total cholesterol
	rs174555	T	0.0812	2.15e-53	11	61336336	FADS1	237.8	HDL cholesterol,LDL cholesterol,Total cholesterol
	rs174601	T	-0.0871	4.13e-53	11	61379716	FADS2	236.5	HDL cholesterol,LDL cholesterol,Total cholesterol
	rs174549	A	-0.0811	5.3e-53	11	61327958	FADS1	237.2	HDL cholesterol,LDL cholesterol,Total cholesterol
	rs174528	T	0.0787	5.5e-53	11	61300075	C11orf9	241.3	HDL cholesterol,LDL cholesterol,Total cholesterol
	rs174548	C	0.0809	7.85e-53	11	61327924	FADS1	236	HDL cholesterol,LDL cholesterol,Total cholesterol
	rs174534	A	0.078	3.2e-52	11	61306034	C11orf9	237	HDL cholesterol,LDL cholesterol,Total cholesterol
	rs108499	T	-0.0788	4.45e-52	11	61303813	C11orf9	232.6	HDL cholesterol,LDL cholesterol,Total cholesterol
	rs174570	T	-0.0813	3.49e-35	11	61353788	FADS2	153	HDL cholesterol,LDL cholesterol,Total cholesterol
	rs2845573	A	0.093	2.19e-32	11	61358484	FADS2	143.3	HDL cholesterol,LDL cholesterol,Total cholesterol
	rs2851682	A	0.0906	2.83e-32	11	61372588	FADS2	139.5	HDL cholesterol,LDL cholesterol,Total cholesterol
	rs2526678	A	-0.0988	6.84e-32	11	61380369	FADS2	139.4	HDL cholesterol,LDL cholesterol,Total cholesterol
	rs174575	C	0.0631	4.39e-29	11	61358579	FADS2	127.8	HDL cholesterol,LDL cholesterol,Total cholesterol
	rs2072114	A	0.0746	1.42e-28	11	61361791	FADS2	124.8	HDL cholesterol,LDL cholesterol,Total cholesterol
	rs2727270	T	-0.0762	5.78e-28	11	61359813	FADS2	119.3	HDL cholesterol,LDL cholesterol,Total cholesterol
	rs2727271	A	0.0761	6.1e-28	11	61359934	FADS2	122.4	HDL cholesterol,LDL cholesterol,Total cholesterol
	rs2524299	A	0.0748	6.93e-28	11	61361358	FADS2	121.8	HDL cholesterol,LDL cholesterol,Total cholesterol
	rs174448	A	0.0536	7.35e-28	11	61396149	FADS3	120.4	Total cholesterol
	rs174449	A	0.0534	1.12e-27	11	61396955	FADS3	119.5	HDL cholesterol,LDL cholesterol,Total cholesterol
	rs174579	T	-0.062	2.59e-27	11	61362189	FADS2	119.1	LDL cholesterol,Total cholesterol
	rs422249	T	-0.0547	1.61e-26	11	61396064	FADS3	115.8	Total cholesterol
	rs174455	A	0.0515	5.37e-26	11	61412693	FADS3	111.1	HDL cholesterol,LDL cholesterol,Total cholesterol
	rs174591	A	-0.0626	6.18e-26	11	61374252	FADS2	113.3	HDL cholesterol,LDL cholesterol,Total cholesterol
	rs174605	T	-0.0558	8.23e-25	11	61383497	FADS2	107.4	HDL cholesterol,LDL cholesterol,Total cholesterol
	rs174611	T	0.055	1.03e-24	11	61384457	FADS2	104.3	HDL cholesterol,LDL cholesterol,Total cholesterol
	rs174593	T	0.0665	8.36e-24	11	61375407	FADS2	102.1	LDL cholesterol,Total cholesterol
	rs174597	C	-0.0666	8.72e-24	11	61377616	FADS2	102.4	LDL cholesterol,Total cholesterol
	rs174602	T	0.0824	5.27e-23	11	61380990	FADS2	99.1	Total cholesterol
	rs174589	C	0.0585	5.88e-23	11	61372379	FADS2	98.8	LDL cholesterol,Total cholesterol
	rs174616	A	-0.0479	4.99e-22	11	61385698	FADS2	92.2	HDL cholesterol,LDL cholesterol,Total cholesterol
	rs968567	T	-0.0588	3.79e-21	11	61352140	FADS2	90.4	Total cholesterol
	rs174626	A	0.0457	6.06e-20	11	61393633	FADS2	83.9	HDL cholesterol,LDL cholesterol,Total cholesterol
	rs174450	T	0.0457	4.97e-19	11	61398118	FADS3	80.6	HDL cholesterol,LDL cholesterol,Total cholesterol
	rs174532	A	0.0574	4.72e-18	11	61305450	C11orf9	75.9	LDL cholesterol,Total cholesterol
	rs526126	C	0.0674	9.62e-18	11	61381461	FADS2	73.1
	rs174468	A	0.05	2.14e-17	11	61420267	RAB3IL1	72.1	LDL cholesterol,Total cholesterol
	rs666870	A	0.0491	1.17e-16	11	61434055	RAB3IL1	69.5
	rs174476	T	0.0491	1.21e-16	11	61430694	RAB3IL1	69.5	Total cholesterol
	rs174478	T	-0.049	1.23e-16	11	61435152	RAB3IL1	69.2
	rs174464#	A	-0.043	5.23e-15	11	61414502	FADS3	61.3
	rs174456	A	0.0428	5.77e-15	11	61412758	FADS3	60.8	HDL cholesterol,Total cholesterol
	rs174634	C	0.0421	5.8e-15	11	61403963	FADS3	61	HDL cholesterol,Total cholesterol
	rs2269928	T	0.0639	7.13e-15	11	61294105	C11orf9	60.9
	rs149803	C	-0.0626	7.24e-15	11	61295596	C11orf9	61.4	Total cholesterol
	rs1000778	A	-0.0409	6.19e-14	11	61411881	FADS3	55.5	HDL cholesterol,Total cholesterol
	rs509360	A	0.0448	1.16e-13	11	61305135	C11orf9	55.9	HDL cholesterol
	rs174479	C	0.0548	1.27e-13	11	61435330	RAB3IL1	55
	rs174627	A	-0.0475	9.53e-13	11	61394042	FADS2	50.4
	rs7394871	A	-0.0912	1.13e-12	11	61409090	FADS3	50.9
	rs3798713	C	0.035	1.93e-12	6	11116608	ELOVL2	49.1
	rs2236212	C	0.0351	1.97e-12	6	11103001	ELOVL2	49.4
	rs3734398	T	-0.0352	3.99e-12	6	11090959	ELOVL2	47.8
	rs1323739	C	-0.0337	1.25e-11	6	11112547	ELOVL2	45.5
	rs1225737	T	0.034	1.52e-11	6	11090638	ELOVL2	46.4
	rs1570069	A	-0.0333	1.68e-11	6	11125811	ELOVL2	46.3
	rs7743830	A	-0.0333	1.72e-11	6	11122206	ELOVL2	46.3
	rs3798711	T	-0.0333	1.81e-11	6	11110796	ELOVL2	44.5
	rs953413	A	0.0332	1.81e-11	6	11120845	ELOVL2	46
	rs2295602	T	-0.0332	1.83e-11	6	11113828	ELOVL2	46
	rs3798707	T	0.0334	1.87e-11	6	11099921	ELOVL2	44.7
	rs17675322	A	0.0363	1.87e-11	6	11167171	ELOVL2	45.3
	rs4532436	C	-0.0338	2.06e-11	6	11091957	ELOVL2	45.8
	rs6900220	T	-0.0364	2.79e-11	6	11173124	ELOVL2	43.9
	rs9295764	A	-0.0352	3.31e-11	6	11153182	ELOVL2	44.2
	rs9295763	C	0.0351	3.31e-11	6	11153178	ELOVL2	44
	rs1321535	T	-0.0371	4.51e-11	6	11184012	HERV-FRD	44
	rs4713165	T	-0.037	4.84e-11	6	11182288	HERV-FRD	43.8
	rs12665478	A	0.037	5.34e-11	6	11188811	HERV-FRD	43.8
	rs12526913	A	-0.0372	5.44e-11	6	11190910	HERV-FRD	42.7
	rs4713169	C	0.0372	5.59e-11	6	11192540	HERV-FRD	42.7
	rs2147041	A	-0.035	1.45e-10	6	11158509	ELOVL2	40.6
	rs17764935	A	-0.081	1.48e-10	11	61421333	RAB3IL1	41.4
	rs4711171	T	0.036	1.56e-10	6	11182333	HERV-FRD	41.4
	rs17764324	T	-0.0483	3.73e-10	11	61391664	FADS2	39.4
	rs17831757	T	0.0482	3.92e-10	11	61391776	FADS2	39.3
	rs11230815	C	0.0481	4.04e-10	11	61392702	FADS2	39.1	Total cholesterol
	rs8523	A	0.0334	4.06e-10	6	11089039	ELOVL2	39.8
	rs7104849	A	0.0479	4.59e-10	11	61394620	FADS3	38.8
	rs9393915	T	0.0389	6.55e-10	6	11180308	ELOVL2	38.2
	rs3756963	T	-0.0364	8.33e-10	6	11130140	ELOVL2	38.1
	rs2180725	T	-0.0361	1.08e-09	6	11133406	ELOVL2	37.5
	rs9295757	T	0.0361	1.14e-09	6	11141611	ELOVL2	37.5
	rs2295601	A	0.0359	1.18e-09	6	11113672	ELOVL2	37.1
	rs9368564	A	-0.0375	1.28e-09	6	11168269	ELOVL2	36.7
	rs17606561	A	0.0365	1.35e-09	6	11090345	ELOVL2	37.1
	rs2281591	A	-0.0359	1.41e-09	6	11098479	ELOVL2	37.1
	rs3798719*	T	0.0352	1.49e-09	6	11144811	ELOVL2	36.9
	rs174469	T	-0.0573	1.63e-09	11	61424019	RAB3IL1	36.4
	rs7482316	A	0.0452	1.87e-09	11	61396774	FADS3	36.4
	rs9393903	A	0.0353	2.25e-09	6	11150895	ELOVL2	35.9
	rs3798723	A	0.0348	2.74e-09	6	11149706	ELOVL2	34.9
	rs1109748	A	-0.0535	5.46e-09	11	61479221	BEST1	33.9
	rs7744440	T	-0.0334	9.62e-09	6	11146497	ELOVL2	33.2
	rs2521572	T	-0.0614	1.2e-08	11	61468051	BEST1	32.4
	rs3798721	A	-0.0328	1.56e-08	6	11148169	ELOVL2	32
	rs11230874	T	0.067	1.72e-08	11	61552162	FTH1	31.7
	rs3798722	A	-0.0327	2.52e-08	6	11148409	ELOVL2	30.8
	rs6918936	C	0.0296	3.34e-08	6	11068144	SYCP2L	30.1
	rs6920247	C	-0.0296	3.35e-08	6	11068159	SYCP2L	30.1
	rs4711146	T	-0.0296	3.37e-08	6	11069391	SYCP2L	30.1
	rs2295600	A	-0.0295	3.42e-08	6	11070236	SYCP2L	31
	rs4713103	T	0.0293	3.76e-08	6	11077127	SYCP2L	30.6
	rs9295733	A	0.0293	4e-08	6	11073433	SYCP2L	30.6
	rs1225717	A	-0.0292	4.21e-08	6	11086226	ELOVL2	30.4
	rs412334	T	0.044	4.59e-08	11	61316837	FEN1	29.6
	*SNP was not present in the LD reference panel.
	#SNP was not avaiable for HDL cholesterol,LDL cholesterol and total cholesterol.

## Sheet: Sheet5
	Table S5.Significant and bi-allelic SNPs(p < 5×10-8) in GWAS of docosahexaenoic acid
	SNP	effect_allele	beta	pval	Chr	Position	Gene	F statiistic
	rs2236212	C	-0.1132	1.26e-15	6	11103001	ELOVL2	64.7
	rs3798713	C	-0.1126	1.4e-15	6	11116608	ELOVL2	64
	rs3734398	T	0.1143	1.65e-15	6	11090959	ELOVL2	63.2
	rs953413	A	-0.1108	2.98e-15	6	11120845	ELOVL2	62.8
	rs4532436	C	0.1128	3.17e-15	6	11091957	ELOVL2	62.4
	rs3798707	T	-0.1112	3.27e-15	6	11099921	ELOVL2	62.4
	rs2295602	T	0.1108	3.3e-15	6	11113828	ELOVL2	62
	rs3798711	T	0.1107	3.54e-15	6	11110796	ELOVL2	61.8
	rs1570069	A	0.1105	3.61e-15	6	11125811	ELOVL2	62.5
	rs1225737	T	-0.1125	3.63e-15	6	11090638	ELOVL2	62.1
	rs7743830	A	0.1105	3.65e-15	6	11122206	ELOVL2	62.5
	rs9295763	C	-0.1165	9.87e-15	6	11153178	ELOVL2	59.7
	rs9295764	A	0.1166	1e-14	6	11153182	ELOVL2	59.8
	rs1323739	C	0.108	2e-14	6	11112547	ELOVL2	58.9
	rs17675322	A	-0.1169	3.5e-14	6	11167171	ELOVL2	57.8
	rs8523	A	-0.1141	3.94e-14	6	11089039	ELOVL2	57.3
	rs6900220	T	0.1173	4.5e-14	6	11173124	ELOVL2	57.4
	rs2147041	A	0.1169	5.02e-14	6	11158509	ELOVL2	57.1
	rs1225717	A	0.113	7.13e-14	6	11086226	ELOVL2	56.2
	rs4713103	T	-0.1129	7.83e-14	6	11077127	SYCP2L	56.1
	rs9295733	A	-0.1122	1.34e-13	6	11073433	SYCP2L	54.6
	rs2295600	A	0.1114	1.99e-13	6	11070236	SYCP2L	53.9
	rs4711146	T	0.1114	2.84e-13	6	11069391	SYCP2L	53.2
	rs6920247	C	0.1114	2.92e-13	6	11068159	SYCP2L	53.2
	rs6918936	C	-0.1114	2.99e-13	6	11068144	SYCP2L	53.2
	rs4711171	T	-0.1158	4.61e-13	6	11182333	HERV-FRD	52.5
	rs1321535	T	0.1151	7.12e-13	6	11184012	HERV-FRD	51.9
	rs12665478	A	-0.1152	7.12e-13	6	11188811	HERV-FRD	52
	rs4713165	T	0.115	7.23e-13	6	11182288	HERV-FRD	51.8
	rs12526913	A	0.1155	7.36e-13	6	11190910	HERV-FRD	51.6
	rs4713169	C	-0.1158	7.48e-13	6	11192540	HERV-FRD	51.9
	rs3798721	A	0.1127	2.32e-12	6	11148169	ELOVL2	49.1
	rs3798723	A	-0.1129	4.39e-12	6	11149706	ELOVL2	48.1
	rs9393903	A	-0.1127	7.29e-12	6	11150895	ELOVL2	47.3
	rs3798719*	T	-0.1111	8.42e-12	6	11144811	ELOVL2	46.6
	rs3798722	A	0.1113	1.2e-11	6	11148409	ELOVL2	46.2
	rs9295757	T	-0.1105	1.65e-11	6	11141611	ELOVL2	45.5
	rs1007323	T	-0.0947	2.2e-11	6	11061230	SYCP2L	45.2
	rs2180725	T	0.1096	2.33e-11	6	11133406	ELOVL2	44.8
	rs1225741	A	0.0946	2.35e-11	6	11060229	SYCP2L	44.5
	rs7744440	T	0.1081	2.58e-11	6	11146497	ELOVL2	44.6
	rs17606561	A	-0.1108	3.43e-11	6	11090345	ELOVL2	44.1
	rs2295601	A	-0.1085	3.51e-11	6	11113672	ELOVL2	43.9
	rs3756963	T	0.109	4.07e-11	6	11130140	ELOVL2	43.7
	rs2281591	A	0.1082	4.29e-11	6	11098479	ELOVL2	43.6
	rs7773173	C	-0.0925	5.42e-11	6	11064689	SYCP2L	43.1
	rs9368564	A	0.1144	5.96e-11	6	11168269	ELOVL2	42.8
	rs1225753	A	0.0915	7.1e-11	6	11064675	SYCP2L	42.8
	rs1225744	T	0.0894	1.28e-10	6	11062526	SYCP2L	41.5
	rs9393915	T	-0.1126	2.66e-10	6	11180308	ELOVL2	40.1
	rs2327325	A	-0.1018	7.24e-09	6	11073640	SYCP2L	33.5
	rs9368506	T	-0.1011	7.38e-09	6	11066458	SYCP2L	33.4
	rs17674802	A	-0.0995	8.21e-09	6	11077505	SYCP2L	33.1
	rs9348766	T	-0.0993	9.03e-09	6	11076568	SYCP2L	33
	rs9791208	T	0.0997	9.81e-09	6	11069635	SYCP2L	32.9
	*SNP was not present in the LD reference panel.
	No SNP was potential pleiotropic effect identified from PhenoScanner.

## Sheet: Sheet6
	Table S6.Significant and bi-allelic SNPs (p < 5×10-8) in GWAS of docosapentaenoic acid
	SNP	effect_allele	beta	pval	Chr	Position	Gene	F statiistic	Potential pleiotropic effect identified from PhenoScanner
	rs174547	T	0.0746	3.79e-154	11	61327359	FADS1	738.9	HDL cholesterol,LDL cholesterol,Total cholesterol
	rs174550	T	0.0746	1.69e-153	11	61328054	FADS1	738.9	HDL cholesterol,LDL cholesterol,Total cholesterol
	rs174546	T	-0.0744	2.51e-153	11	61326406	FADS1	734.7	HDL cholesterol,LDL cholesterol,Total cholesterol
	rs102275	T	0.0744	8.39e-153	11	61314379	C11orf10	734.7	HDL cholesterol,LDL cholesterol,Total cholesterol
	rs174545	C	0.0743	2.42e-152	11	61325882	FADS1	732.7	HDL cholesterol,LDL cholesterol,Total cholesterol
	rs1535	A	0.0744	2.55e-152	11	61354548	FADS2	734.7	HDL cholesterol,LDL cholesterol,Total cholesterol
	rs174535	T	0.0746	1.46e-151	11	61307932	C11orf9	738.9
	rs174536	A	0.0745	1.57e-151	11	61308503	C11orf9	736.8	HDL cholesterol,LDL cholesterol,Total cholesterol
	rs174574	A	-0.0745	1.93e-151	11	61356918	FADS2	736.8	HDL cholesterol,LDL cholesterol,Total cholesterol
	rs174576	A	-0.0752	9.13e-151	11	61360086	FADS2	698.4	HDL cholesterol,LDL cholesterol,Total cholesterol
	rs174537	T	-0.0742	2.11e-150	11	61309256	C11orf9	730.6	HDL cholesterol,LDL cholesterol,Total cholesterol
	rs174578	A	-0.0751	1.94e-149	11	61362075	FADS2	696.5	HDL cholesterol,LDL cholesterol,Total cholesterol
	rs174577	A	-0.0747	2.67e-149	11	61361390	FADS2	688.8	HDL cholesterol,LDL cholesterol,Total cholesterol
	rs174583	T	-0.0743	4.17e-147	11	61366326	FADS2	681.2	HDL cholesterol,LDL cholesterol,Total cholesterol
	rs174541	T	0.0724	2.3e-140	11	61322484	FADS1	645.6	HDL cholesterol,LDL cholesterol,Total cholesterol
	rs174549	A	-0.0744	1.3e-139	11	61327958	FADS1	636.7	HDL cholesterol,LDL cholesterol,Total cholesterol
	rs4246215	T	-0.0721	1.38e-139	11	61320875	FEN1	640	HDL cholesterol,LDL cholesterol,Total cholesterol
	rs174555	T	0.0739	8.76e-139	11	61336336	FADS1	673.6	HDL cholesterol,LDL cholesterol,Total cholesterol
	rs174556	T	-0.0729	1.04e-138	11	61337211	FADS1	654.8	HDL cholesterol,LDL cholesterol,Total cholesterol
	rs174548	C	0.0737	3.47e-138	11	61327924	FADS1	669.8	HDL cholesterol,LDL cholesterol,Total cholesterol
	rs174601	T	-0.078	2.39e-136	11	61379716	FADS2	656.1	HDL cholesterol,LDL cholesterol,Total cholesterol
	rs174538	A	-0.0738	4.43e-136	11	61316657	C11orf10	626.1	HDL cholesterol,LDL cholesterol,Total cholesterol
	rs174528	T	0.0718	1.13e-135	11	61300075	C11orf9	634.5	HDL cholesterol,LDL cholesterol,Total cholesterol
	rs174534	A	0.0702	8.26e-122	11	61306034	C11orf9	564.7	HDL cholesterol,LDL cholesterol,Total cholesterol
	rs108499	T	-0.0706	2.52e-121	11	61303813	C11orf9	571.4	HDL cholesterol,LDL cholesterol,Total cholesterol
	rs174575	C	0.0617	2.17e-84	11	61358579	FADS2	379.6	HDL cholesterol,LDL cholesterol,Total cholesterol
	rs174591	A	-0.0605	1.18e-73	11	61374252	FADS2	342.5	HDL cholesterol,LDL cholesterol,Total cholesterol
	rs2072114	A	0.0655	4.45e-64	11	61361791	FADS2	286.5	HDL cholesterol,LDL cholesterol,Total cholesterol
	rs174579	T	-0.0573	4.08e-63	11	61362189	FADS2	288.6	LDL cholesterol,Total cholesterol
	rs2727270	T	-0.0658	1.66e-61	11	61359813	FADS2	274.7	HDL cholesterol,LDL cholesterol,Total cholesterol
	rs2727271	A	0.0657	2.29e-61	11	61359934	FADS2	273.9	HDL cholesterol,LDL cholesterol,Total cholesterol
	rs174448	A	0.0474	2.89e-60	11	61396149	FADS3	271.2	Total cholesterol
	rs174449	A	0.0472	7.58e-60	11	61396955	FADS3	268.8	HDL cholesterol,LDL cholesterol,Total cholesterol
	rs174570	T	-0.0616	8.12e-60	11	61353788	FADS2	266.7	HDL cholesterol,LDL cholesterol,Total cholesterol
	rs2524299	A	0.0643	9.19e-60	11	61361358	FADS2	276	HDL cholesterol,LDL cholesterol,Total cholesterol
	rs174593	T	0.0616	9.4e-57	11	61375407	FADS2	253	LDL cholesterol,Total cholesterol
	rs174597	C	-0.0618	1.12e-56	11	61377616	FADS2	254.6	LDL cholesterol,Total cholesterol
	rs174602	T	0.0784	1.46e-56	11	61380990	FADS2	259.7	Total cholesterol
	rs422249	T	-0.0482	1.9e-56	11	61396064	FADS3	261.9	Total cholesterol
	rs174455	A	0.0462	9.33e-56	11	61412693	FADS3	257.4	HDL cholesterol,LDL cholesterol,Total cholesterol
	rs2845573	A	0.0697	4.45e-51	11	61358484	FADS2	232.5	HDL cholesterol,LDL cholesterol,Total cholesterol
	rs174532	A	0.0594	5.19e-51	11	61305450	C11orf9	223.2	LDL cholesterol,Total cholesterol
	rs968567	T	-0.0558	6.15e-51	11	61352140	FADS2	230.3	Total cholesterol
	rs174616	A	-0.0414	6.34e-50	11	61385698	FADS2	221.3	HDL cholesterol,LDL cholesterol,Total cholesterol
	rs174611	T	0.0455	2.91e-48	11	61384457	FADS2	218	HDL cholesterol,LDL cholesterol,Total cholesterol
	rs174589	C	0.0508	6.47e-48	11	61372379	FADS2	213.1	LDL cholesterol,Total cholesterol
	rs174450	T	0.0405	6.44e-47	11	61398118	FADS3	211.7	HDL cholesterol,LDL cholesterol,Total cholesterol
	rs174605	T	-0.0452	7.48e-47	11	61383497	FADS2	215.1	HDL cholesterol,LDL cholesterol,Total cholesterol
	rs2526678	A	-0.0703	1.16e-45	11	61380369	FADS2	199.9	HDL cholesterol,LDL cholesterol,Total cholesterol
	rs174626	A	0.0391	5.63e-44	11	61393633	FADS2	197.1	HDL cholesterol,LDL cholesterol,Total cholesterol
	rs3734398	T	-0.0404	9.61e-44	6	11090959	ELOVL2	196.2
	rs2851682	A	0.064	1.83e-43	11	61372588	FADS2	195.7	HDL cholesterol,LDL cholesterol,Total cholesterol
	rs2236212	C	0.0395	2.87e-43	6	11103001	ELOVL2	187.4
	rs1225737	T	0.0396	7.06e-43	6	11090638	ELOVL2	188.4
	rs4532436	C	-0.0396	7.78e-43	6	11091957	ELOVL2	188.4
	rs3798713	C	0.0392	9.71e-43	6	11116608	ELOVL2	184.6
	rs3798707	T	0.039	1.19e-42	6	11099921	ELOVL2	196.1
	rs3798711	T	-0.0387	2.47e-42	6	11110796	ELOVL2	193.1
	rs1570069	A	-0.0386	3.48e-42	6	11125811	ELOVL2	192.1
	rs2295602	T	-0.0386	3.56e-42	6	11113828	ELOVL2	192.1
	rs7743830	A	-0.0386	4.07e-42	6	11122206	ELOVL2	192.1
	rs953413	A	0.0383	9.07e-42	6	11120845	ELOVL2	189
	rs17675322	A	0.0422	3.3e-41	6	11167171	ELOVL2	187.2
	rs2269928	T	0.0605	6.19e-41	11	61294105	C11orf9	182.6
	rs9295763	C	0.041	6.64e-41	6	11153178	ELOVL2	176.6
	rs9295764	A	-0.0411	6.88e-41	6	11153182	ELOVL2	177.5
	rs9368564	A	-0.0481	1e-40	6	11168269	ELOVL2	180.3
	rs6900220	T	-0.0422	1.21e-40	6	11173124	ELOVL2	175.6
	rs526126	C	0.062	3.42e-40	11	61381461	FADS2	175.7
	rs9393915	T	0.0482	6.09e-40	6	11180308	ELOVL2	181
	rs174634	C	0.0422	6.13e-40	11	61403963	FADS3	175.6	HDL cholesterol,Total cholesterol
	rs149803	C	-0.0592	7.47e-40	11	61295596	C11orf9	174.7	Total cholesterol
	rs174464#	A	-0.0422	1.65e-39	11	61414502	FADS3	175.6
	rs2147041	A	-0.0415	2.01e-39	6	11158509	ELOVL2	169.8
	rs174456	A	0.0419	2.72e-39	11	61412758	FADS3	173.1	HDL cholesterol,Total cholesterol
	rs17606561	A	0.0451	2.84e-39	6	11090345	ELOVL2	177.7
	rs9393903	A	0.0442	3.19e-39	6	11150895	ELOVL2	170.6
	rs1000778	A	-0.0415	3.49e-39	11	61411881	FADS3	169.8	HDL cholesterol,Total cholesterol
	rs8523	A	0.0397	8.17e-39	6	11089039	ELOVL2	176.8
	rs9295757	T	0.0436	8.58e-39	6	11141611	ELOVL2	176.3
	rs3798723	A	0.0436	8.63e-39	6	11149706	ELOVL2	176.3
	rs2180725	T	-0.0436	9.58e-39	6	11133406	ELOVL2	176.3
	rs1321535	T	-0.0423	1.1e-38	6	11184012	HERV-FRD	176.4
	rs2281591	A	-0.0437	1.58e-38	6	11098479	ELOVL2	166.7
	rs2295601	A	0.0435	1.68e-38	6	11113672	ELOVL2	165.2
	rs4713165	T	-0.0421	2e-38	6	11182288	HERV-FRD	174.7
	rs3798719*	T	0.043	2.29e-38	6	11144811	ELOVL2	171.4
	rs12665478	A	0.0421	2.39e-38	6	11188811	HERV-FRD	164.2
	rs12526913	A	-0.0422	2.63e-38	6	11190910	HERV-FRD	165
	rs4713169	C	0.0423	2.82e-38	6	11192540	HERV-FRD	165.8
	rs7744440	T	-0.0429	5.26e-38	6	11146497	ELOVL2	170.6
	rs3756963	T	-0.0434	5.61e-38	6	11130140	ELOVL2	164.4
	rs4711171	T	0.0414	2.45e-37	6	11182333	HERV-FRD	168.9
	rs509360	A	0.0456	1.04e-36	11	61305135	C11orf9	161.9	HDL cholesterol
	rs4713103	T	0.0389	2.77e-36	6	11077127	SYCP2L	158.8
	rs3798722	A	-0.0424	2.98e-36	6	11148409	ELOVL2	156.9
	rs9295733	A	0.0387	6.65e-36	6	11073433	SYCP2L	157.2
	rs2295600	A	-0.0387	7.51e-36	6	11070236	SYCP2L	157.2
	rs6920247	C	-0.0389	1.13e-35	6	11068159	SYCP2L	158.8
	rs6918936	C	0.0389	1.21e-35	6	11068144	SYCP2L	158.8
	rs1225717	A	-0.0384	1.25e-35	6	11086226	ELOVL2	154.7
	rs4711146	T	-0.0388	1.32e-35	6	11069391	SYCP2L	158
	rs3798721	A	-0.041	2.47e-35	6	11148169	ELOVL2	155.7
	rs174468	A	0.0424	3.26e-35	11	61420267	RAB3IL1	156.9	LDL cholesterol,Total cholesterol
	rs174476	T	0.0408	3.35e-33	11	61430694	RAB3IL1	145.1	Total cholesterol
	rs666870	A	0.0408	3.4e-33	11	61434055	RAB3IL1	145.1
	rs174478	T	-0.0406	4.06e-33	11	61435152	RAB3IL1	143.7
	rs1323739	C	-0.0335	1.41e-31	6	11112547	ELOVL2	134.4
	rs174479	C	0.0545	3.04e-31	11	61435330	RAB3IL1	135.5
	rs2327325	A	0.0435	4.5e-31	6	11073640	SYCP2L	132
	rs17674802	A	0.0418	4.78e-30	6	11077505	SYCP2L	128.5
	rs9348766	T	0.0418	5.55e-30	6	11076568	SYCP2L	128.5
	rs174627	A	-0.0444	6.07e-30	11	61394042	FADS2	130.5
	rs9791208	T	-0.0419	7.94e-30	6	11069635	SYCP2L	129.1
	rs9368506	T	0.0416	3.12e-29	6	11066458	SYCP2L	127.3
	rs412334	T	0.0554	1.4e-26	11	61316837	FEN1	114.2
	rs174469	T	-0.0717	8.14e-26	11	61424019	RAB3IL1	111.9
	rs7773173	C	0.0287	6.21e-24	6	11064689	SYCP2L	105.7
	rs1225753	A	-0.0283	1.99e-23	6	11064675	SYCP2L	102.7
	rs1225744	T	-0.0278	3.05e-23	6	11062526	SYCP2L	99.1
	rs1225741	A	-0.0281	6.27e-23	6	11060229	SYCP2L	94.4
	rs1007323	T	0.0281	7.68e-23	6	11061230	SYCP2L	94.4
	rs740006	T	-0.0764	4.5e-22	11	61314444	C11orf10	94
	rs7394871	A	-0.0637	3.56e-16	11	61409090	FADS3	66.9
	rs12207488	A	0.0274	4.87e-16	6	11060322	SYCP2L	65.2
	rs9379969※	A	0.0274	5.39e-16	6	11060622	SYCP2L	65.2
	rs498793※	T	0.0307	5.84e-16	11	61381281	FADS2	65.5
	rs12199131	A	0.0267	7.69e-16	6	11040555	SYCP2L	65.7
	rs12214825	T	0.0274	1.05e-15	6	11041364	SYCP2L	65.2
	rs650436	T	0.0254	1.11e-15	11	61293006	C11orf9	63.2
	rs9393800	A	-0.0266	6.1e-15	6	11059723	SYCP2L	61.4
	rs7942717	A	0.0677	8.49e-15	11	61403864	FADS3	60.7
	rs579383	A	-0.0241	1.12e-14	11	61293159	C11orf9	60.6
	rs17764935	A	-0.0583	1.17e-14	11	61421333	RAB3IL1	59
	rs9461310	A	-0.025	4.13e-14	6	11028182	SYCP2L	57.6
	rs174472	A	0.0274	5.74e-14	11	61428532	RAB3IL1	55
	rs12213249	T	0.0255	7.55e-14	6	11034928	SYCP2L	56.4
	rs9366669	A	0.0249	1.1e-13	6	11016855	SYCP2L	57.1
	rs12200867	C	0.0255	1.3e-13	6	11047810	SYCP2L	53.2
	rs17762402	A	0.0805	1.42e-13	11	61309777	C11orf9	54.7
	rs2327323	C	0.0252	2.26e-13	6	11041799	SYCP2L	55.1
	rs1578068	T	0.0251	2.32e-13	6	11046090	SYCP2L	54.7
	rs9393804	T	-0.0225	2.33e-13	6	11064116	SYCP2L	52.8
	rs2235093	A	0.0263	5.36e-13	11	61421698	RAB3IL1	53.5
	rs6928281	T	0.0226	8.04e-13	6	11016903	SYCP2L	50
	rs4713044	A	0.0225	9.07e-13	6	11019268	SYCP2L	49.6
	rs13966	T	0.0248	9.92e-13	11	61421568	RAB3IL1	50.3
	rs7759825	T	-0.0218	1.18e-12	6	11064635	SYCP2L	49.6
	rs12190237	A	-0.0228	1.58e-12	6	11030624	SYCP2L	50.9
	rs198464	A	0.0191	7.47e-12	11	61278197	C11orf9	46.6
	rs198462	A	0.0193	7.64e-12	11	61280695	C11orf9	47.6
	rs198476	A	0.0193	8.38e-12	11	61282306	C11orf9	47.6
	rs17156442	T	-0.0513	2.09e-11	11	61370599	FADS2	44.5
	rs7935946	T	-0.0482	4.72e-11	11	61372118	FADS2	43.7
	rs9467921	C	-0.0211	1.43e-10	6	11018605	SYCP2L	41
	rs17675073	A	-0.027	3.54e-10	6	11116635	ELOVL2	39.5
	rs9366664	T	0.0175	4.18e-10	6	11000485	SYCP2L	39.1
	rs569258	T	-0.0187	4.37e-10	11	61277244	C11orf9	38.9
	rs946350	C	0.0175	4.39e-10	6	11000939	SYCP2L	39.1
	rs12195587	A	-0.0269	4.51e-10	6	11097928	ELOVL2	39.2
	rs17764324	T	-0.0284	1.05e-09	11	61391664	FADS2	36.6
	rs17831757	T	0.0283	1.16e-09	11	61391776	FADS2	36.3
	rs916924	T	0.0469	1.19e-09	11	61375757	FADS2	37.2
	rs11230815	C	0.0283	1.22e-09	11	61392702	FADS2	36.3	Total cholesterol
	rs3846851	A	0.0205	1.24e-09	6	11144570	ELOVL2	36.4
	rs7104849	A	0.0281	1.42e-09	11	61394620	FADS3	37.4
	rs2521572	T	-0.0497	2.17e-09	11	61468051	BEST1	35.9
	rs7482316	A	0.0275	2.63e-09	11	61396774	FADS3	35.8
	rs198426	T	0.0179	3.22e-09	11	61247062	DAGLA	35.7
	rs3734397	A	0.0191	4.48e-09	6	11090834	ELOVL2	33.6
	rs1109748	A	-0.04	5.09e-09	11	61479221	BEST1	34.7
	rs976081	T	0.0187	6.2e-09	6	11111861	ELOVL2	34.2
	rs780094	T	0.0167	9.04e-09	2	27594741	GCKR	33.2	Total cholesterol
	rs6936315	T	0.0244	1.34e-08	6	11143958	ELOVL2	32.3
	rs1260326	T	0.0165	1.44e-08	2	27584444	GCKR	32.4	Total cholesterol
	rs695867	A	0.04	1.52e-08	11	61317864	FEN1	31.8
	rs1692120	A	0.017	1.54e-08	11	61174048	DAGLA	32.2
	rs6456745	A	0.0166	1.54e-08	6	11002254	SYCP2L	32.8
	rs780093	T	0.0163	2.04e-08	2	27596107	GCKR	31.6	Total cholesterol
	rs1359159	C	-0.0237	3.3e-08	6	11042357	SYCP2L	30.4
	*SNP was not present in the LD reference panel.
	#SNP was not avaiable for HDL cholesterol,LDL cholesterol and total cholesterol.
	※SNPs were not avaiable for diastolic blood pressure and systolic blood pressure.
