# Supplementary material for: Roles for circulating polyunsaturated fatty acids in ischemic stroke and modifiable factors: a Mendelian randomization study
Source: Nutr J. 2020 Jul 11;19:70. doi: 10.1186/s12937-020-00582-4 (PMC7354684; doi:10.1186/s12937-020-00582-4)
Supplement: Supplementary file 4 — Additional file 4: Table S1. Top significant and independent SNPs (p < 5 × 10− 8, LD r2 < 0.001) in GWAS of linoleic acid. Table S2. Top significant and independent SNPs (p < 5 × 10− 8, LD r2 < 0.001) in GWAS of arachidonic acid. Table S3. Top significant and independent SNPs (p < 5 × 10− 8, LD r2 < 0.001) in GWAS of a-linolenic acid. Table S4. Top significant and independent SNPs (p < 5 × 10− 8, LD r2 < 0.001) in GWAS of eicosapentaenoic acid. Table S5. Top significant and independent SNPs (p < 5 × 10− 8, LD r2 < 0.001) in GWAS of docosahexaenoic acid. Table S6. Top significant and independent SNPs (p < 5 × 10− 8, LD r2 < 0.001) in GWAS of docosapentaenoic acid. [file 12937_2020_582_MOESM4_ESM.xlsx]

## Sheet: Sheet1
	Table S1.Top significant and independent SNPs (p < 5×10-8, LD r2<0.001) in GWAS of linoleic acid
	Type of FA	FA	SNP	effect_allele	other_allele	eaf	beta	se	pval	Chr	Position	Gene	% Variance Explained	samplesize
	n-6 PUFA	linoleic acid (18:2n6, LA)	rs10740118	G	C	0.56	0.25	0.05	8.08e-09	10	64771213	JMJD1C	0.2-0.7	8631
	n-6 PUFA	linoleic acid (18:2n6, LA)	rs174547	C	T	0.323	1.47	0.05	4.98e-274	11	61327359	FADS1	7.6-18.1	8631
	n-6 PUFA	linoleic acid (18:2n6, LA)	rs16966952	A	G	0.309	0.35	0.04	1.23e-15	16	15043444	NTAN1	0.5-2.5	8631

## Sheet: Sheet2
	Table S2.Top significant and independent SNPs (p < 5×10-8, LD r2<0.001) in GWAS of arachidonic acid
	Type of FA	FA	SNP	effect_allele	other_allele	eaf	beta	se	pval	Chr	Position	Gene	% Variance Explained	samplesize
	n-6 PUFA	arachidonic acid (20:4n6, AA)	rs174547	T	C	0.68	1.69	0.02	3E-971	11	61327359	FADS1	3.7-37.6	8631
	n-6 PUFA	arachidonic acid (20:4n6, AA)	rs16966952	G	A	0.692	0.2	0.03	2.43e-10	16	15043444	NTAN1	0.1-0.6	8631

## Sheet: Sheet3
	Table S3.Top significant and independent SNPs (p < 5×10-8, LD r2<0.001) in GWAS of a-linolenic acid
	Type of FA	FA	SNP	effect_allele	other_allele	eaf	beta	se	pval	Chr	Position	Gene	% Variance Explained	samplesize
	n-3 PUFA	a-linolenic acid (ALA, 18:3n3)	rs174547	C	T	0.67	0.0159	0.001	3.47e-64	11	61327359	FADS1	3.8	8866

## Sheet: Sheet4
	Table S4.Top significant and independent SNPs (p < 5×10-8, LD r2<0.001) in GWAS of eicosapentaenoic acid
	Type of FA	FA	SNP	effect_allele	other_allele	eaf	beta	se	pval	Chr	Position	Gene	% Variance Explained	samplesize
	n-3 PUFA	eicosapentaenoic acid (EPA, 20:5n-3)	rs3798713	C	G	0.43	0.035	0.0051	1.93e-12	6	11116608	ELOVL2	0.4	8866
	n-3 PUFA	eicosapentaenoic acid (EPA, 20:5n-3)	rs174538	G	A	0.72	0.0834	0.0056	5.37e-58	11	61316657	C11orf10	2	8866

## Sheet: Sheet5
	Table S5.Top significant and independent SNPs (p < 5×10-8, LD r2<0.001) in GWAS of docosahexaenoic acid
	Type of FA	FA	SNP	effect_allele	other_allele	eaf	beta	se	pval	Chr	Position	Gene	% Variance Explained	samplesize
	n-3 PUFA	docosahexaenoic acid (DHA, 22:6n3)	rs2236212	G	C	0.57	0.1132	0.0143	1.26e-15	6	11103001	ELOVL2	0.7	8866

## Sheet: Sheet6
	Table S6.Top significant and independent SNPs (p < 5×10-8, LD r2<0.001) in GWAS of docosapentaenoic acid
	Type of FA	FA	SNP	effect_allele	other_allele	eaf	beta	se	pval	Chr	Position	Gene	% Variance Explained	samplesize
	n-3 PUFA	docosapentaenoic acid (DPA, 22:5n-3)	rs780094	T	C	0.41	0.0167	0.0031	9.04e-09	2	27594741	GCKR	0.47	8866
	n-3 PUFA	docosapentaenoic acid (DPA, 22:5n-3)	rs3734398	C	T	0.57	0.0404	0.0026	9.61e-44	6	11090959	ELOVL2	2.8	8866
	n-3 PUFA	docosapentaenoic acid (DPA, 22:5n-3)	rs174547	T	C	0.33	0.0746	0.0026	3.79e-154	11	61327359	FADS1	8.6	8866
