# Supplementary material for: Roles for circulating polyunsaturated fatty acids in ischemic stroke and modifiable factors: a Mendelian randomization study
Source: Nutr J. 2020 Jul 11;19:70. doi: 10.1186/s12937-020-00582-4 (PMC7354684; doi:10.1186/s12937-020-00582-4)
Supplement: Supplementary file 5 — Additional file 5: Table S1. Gene functionally relevant to the metabolism of each fatty acids. Table S2. Sensitivity analysis for linoleic acid (number of SNP = 3). Table S3. Sensitivity analysis for docosapentaenoic acid (number of SNP = 3). Table S4. Power calculation for the associations of plasma fatty acids with Ischemic stroke. [file 12937_2020_582_MOESM5_ESM.xlsx]

## Sheet: ST1
	Table S1.Gene functionally relevent to the metabolism of each fatty acids
	fatty acids	functional gene
	linoleic acid	FADS1 , FADS2 , NTAN1
	arachidonic acid	FADS1 , FADS2 , NTAN1
	α -linolenic acid	FADS1, FADS2
	eicosapentaenoic acid	FADS1, FADS2,ELOVL2
	docosahexaenoic acid	FADS1, FADS2,ELOVL2
	docosapentaenoic acid	FADS1, FADS2,ELOVL2
	[1].Guan, W., et al., Genome-wide association study of plasma N6 polyunsaturated fatty acids within the cohorts for heart and aging research in genomic epidemiology consortium. Circ Cardiovasc Genet, 2014. 7(3): p. 321-331.
	[2].Lemaitre, R.N., et al., Genetic loci associated with plasma phospholipid n-3 fatty acids: a meta-analysis of genome-wide association studies from the CHARGE Consortium. PLoS Genet, 2011. 7(7): p. e1002193.

## Sheet: ST2
	Table S2.Sensitivity analysis for linoleic acid (number of SNP=3)
	Outcome	Method	OR	SE	95%CI	pvalue	MR Egger intercept p
	IS	Weighted median	0.927	-0.076	0.874,0.983	0.01	0.39
	IS	Weighted mode	0.924	-0.079	0.871,0.98	0.118
			Beta		95% CI
	HDL cholesterol	Weighted median	-0.072	-0.072	-0.085,-0.058	<0.001*	0.37
	HDL cholesterol	Weighted mode	-0.072	-0.072	-0.084,-0.059	0.008*
	LDL cholesterol	Weighted median	-0.091	-0.091	-0.106,-0.076	<0.001*	0.96
	LDL cholesterol	Weighted mode	-0.092	-0.092	-0.107,-0.076	0.007*
	Total cholesterol	Weighted median	-0.085	-0.085	-0.100,-0.07	<0.001*	0.99
	Total cholesterol	Weighted mode	-0.086	-0.086	-0.100,-0.072	0.007*
	DBP	Weighted median	0.018	0.018	0.009,0.026	<0.001*	0.42
	DBP	Weighted mode	0.017	0.017	0.009,0.026	0.061
	SBP	Weighted median	0	0	-0.009,0.009	0.958	0.21
	SBP	Weighted mode	-0.001	-0.001	-0.01,0.008	0.862
	*remained Bonferroni-corrected significance (p<0.00833)

## Sheet: ST3
	Table S3.Sensitivity analysis for docosapentaenoic acid (number of SNP=3)
	Outcome	Method	OR	SE	95%CI	pvalue	MR Egger intercept p
	IS	Weighted median	1.049	0.048	0.978,1.126	0.1801	0.53
	IS	Weighted mode	1.107	0.102	1.025,1.196	0.1215
			Beta		95%CI
	HDL cholesterol	Weighted median	1.075	0.072	1.058,1.092	<0.001*	0.17
	HDL cholesterol	Weighted mode	1.083	0.08	1.065,1.102	0.011
	LDL cholesterol	Weighted median	1.108	0.103	1.09,1.127	<0.001*	0.84
	LDL cholesterol	Weighted mode	1.115	0.109	1.094,1.136	0.008*
	Total cholesterol	Weighted median	1.097	0.093	1.079,1.115	<0.001*	0.48
	Total cholesterol	Weighted mode	1.102	0.097	1.084,1.121	0.007*
	DBP	Weighted median	0.984	-0.016	0.973,0.995	0.006*	0.6
	DBP	Weighted mode	0.979	-0.021	0.967,0.991	0.078
	SBP	Weighted median	1.001	0.001	0.99,1.011	0.9	0.53
	SBP	Weighted mode	1.001	0.001	0.99,1.011	0.904
	*remained Bonferroni-corrected significance (p<0.00833)

## Sheet: ST4
	Table S4. Power calculation for the associations of plasma fatty acids with Ischemic stroke
		% variance of top significant SNPs explained*				Odds ratio
	Exposure		Outcome	Sample size	Cases	0.7	0.8	0.9	1.1	1.2	1.3
	LA	14.5	IS	29633	10307	1	1	0.89	0.84	1	1
	AA	21	IS	29633	10307	1	1	0.97	0.95	1	1
	ALA	1	IS	29633	10307	0.8	0.43	0.14	0.12	0.34	0.61
	DPA	11.6	IS	29633	10307	1	1	0.83	0.77	1	1
	DHA	0.7	IS	29633	10307	0.65	0.32	0.11	0.11	0.25	0.47
	EPA	2.1	IS	29633	10307	0.98	0.73	0.23	0.21	0.61	0.9
	* % Variance explained by selected SNPs were approximately estimated by using the average values of % vairance explained by SNPs reported in GWAS studies.
